# Supplementary material for: Metabolomics Tools Assisting Classic Screening Methods in Discovering New Antibiotics from Mangrove Actinomycetia in Leizhou Peninsula
Source: MDPI journal article supplement (doi:10.3390/md19120688), 2021-12-01
Supplement: s1 [file s1]

## Supplementary Materials

# Metabolomics Tools Assisting Classic Screening Methods in Discovering New Antibiotics from Mangrove Actinomycetia in Leizhou Peninsula

Qin-Pei Lu <sup>1,2,†</sup>, Yong-Mei Huang <sup>3,4,†</sup>, Shao-Wei Liu <sup>1,2</sup>, Gang Wu <sup>1,2</sup>, Qin Yang <sup>1,2</sup>, Li-Fang Liu <sup>1,2</sup>, Hai-Tao Zhang<sup>3</sup>, Yi Qi <sup>3,4</sup>, Ting Wang <sup>1,2</sup>, Zhong-Ke Jiang <sup>1,2</sup>, Jun-Jie Li <sup>3</sup>, Hao Cai <sup>5</sup>, Xiu-Jun Liu <sup>5</sup>, Hui Luo <sup>3,4,\*</sup> and Cheng-Hang Sun <sup>1,2,\*</sup>

<sup>1</sup>Department of Microbial Chemistry, Institute of Medicinal Biotechnology, Chinese Academy of Medical Sciences & Peking Union Medical College, Beijing 100050, China; qinpei89@hotmail.com (Q.-P.L.); liushaowei3535@163.com (S.-W.L.); gangwu@aliyun.com (G.W.); tingwang0707@imb.pumc.edu.cn (T.W.); yangqin@imb.pumc.edu.cn (Q.Y.); LiuLiFang@imb.pumc.edu.cn (L.-F.L.); jiangzhongke@126.com (Z.-K.J.)

<sup>2</sup>Beijing Key Laboratory of Antimicrobial Agents, Institute of Medicinal Biotechnology, Chinese Academy of Medical Sciences & Peking Union Medical College, Beijing 100050, China.

<sup>3</sup>The Key Lab of Zhanjiang for R&D Marine Microbial Resources in the Beibu Gulf Rim, Marine Biomedical Research Institute, Guangdong Medical University, Zhanjiang 524023, China; huangym@gdmu.edu.cn (Y.-M.H.); taohaizhang33@163.com (H.-T.Z.); qiyi7272@gdmu.edu.cn (Y.Q.); jlleeee@gdmu.edu.cn (J.-J.L.)

<sup>4</sup>Marine Biomedical Research Institute of Guangdong Zhanjiang, Zhanjiang 524023, China.

<sup>5</sup>Department of Oncology, Institute of Medicinal Biotechnology, Chinese Academy of Medical Sciences & Peking Union Medical College, Beijing 100050, China; caihao@imb.pumc.edu.cn (H.C.); Liuxiujun2000@imb.pumc.edu.cn (X.-J. L.)

\* Correspondence: chenghangsun@hotmail.com or sunchenghang@imb.pumc.edu.cn (C.-H.S.); Tel.: +86-10-63165272 (C.-H.S.); luohui@gdmu.edu.cn (H.L.)

<sup>†</sup>These authors contributed equally to this work.

## Content

**Table S1.** Composition of 12 different media used to isolate actinomycetial strains from 13 mangrove soil samples.

**Table S2.** Information on genera distribution of actinomycetial strains isolated from 13 different mangrove soil samples.

**Table S3.** Information on genera distribution of actinomycetial strains recovered from the 12 different cultural media.

**Table S4.** Antibacterial activities of 179 actinomycetial strains by the paper disc diffusion method.

**Table S5.** The trioxacarcin-type antibiotics isolated from the actinomycetial strains.

**Table S6.** The information of mangrove-derived soil samples in different sites of Leizhou Peninsula, China.

**Figure S1.** The UV spectra of three outliers (1-3) of samples Y46 and H12.

**Figure S2.** The feature statistic plot of 16.71\_724.4749n (4) in all samples.

**Figure S3.** The MS/MS fragment pattern of the outlier 16.71\_724.4749n (4) in sample H7.

**Figure S4.** The MS/MS spectra of three false positive compounds in H7 acquired by DDA method.

**Figure S5.** The MS/MS spectra of three revised compounds (7-9) in H7 acquired by DDA method.

**Figure S6.** The positive and negative MS spectra of two revised compounds in the LC-MS of H7.

**Figure S7.** The UV spectra of three compounds (7-9) of H7 eluting with ACN and H<sub>2</sub>O.

**Figure S8.** The MS/MS spectra of two compounds (10-11) in H37 acquired by MSE method.

**Figure S9.** The UV spectra of seven trioxacarcin-type compounds (12, 14-19) in the UPLC-UV-HRMS chromatograms of M22.

**Figure S10.** The MS spectra of seven trioxacarcin-type compounds (12, 14-19) in the UPLC-UV-HRMS chromatograms of M22.

**Figure S11.** The VIP score of selected markers in the OPLS-DA model.

**Figure S12.** Molecular network of the cluster containing the compound 15.40\_566.4171n (13) in M22 extract.

**Figure S13.** Molecular network of the cluster containing the compounds 10.64\_900.5435n (10) and 11.08\_928.5742n (11) in H37 extract.

**Figure S14.** The UV spectrum of compound 16.

**Figure S15.** The HRESIMS of compound 16.

**Figure S16.** The IR spectrum of compound 16.

**Figure S17.** The <sup>1</sup>H NMR (600 MHz) spectrum of compound 16 in CDCl<sub>3</sub>.

**Figure S18.** The <sup>13</sup>C NMR (150 MHz) spectrum of compound 16 in CDCl<sub>3</sub>.

**Figure S19.** The DEPT spectrum of compound 16.

**Figure S20.** The <sup>1</sup>H-<sup>1</sup>H COSY spectrum of compound 16.

**Figure S21.** The HSQC spectrum of compound 16.

**Figure S22.** The HMBC spectrum of compound 16.

**Figure S23.** The UV spectrum of compound 20.

**Figure S24.** The HRESIMS of compound **20**.

**Figure S25.** The IR spectrum of compound **20**.

**Figure S26.** The  $^1\text{H}$  NMR (600 MHz) spectrum of compound **20** in  $\text{CDCl}_3$ .

**Figure S27.** The  $^{13}\text{C}$  NMR (150 MHz) spectrum of compound **20** in  $\text{CDCl}_3$ .

**Figure S28.** The DEPT spectrum of compound **20**.

**Figure S29.** The  $^1\text{H}$ - $^1\text{H}$  COSY spectrum of compound **20**.

**Figure S30.** The HSQC spectrum of compound **20**.

**Figure S31.** The HMBC spectrum of compound **20**.

**Figure S32.** The HRESIMS of compound **12**.

**Figure S33.** The  $^1\text{H}$  NMR (500 MHz) spectrum of compound **12** in  $\text{CDCl}_3$ .

**Figure S34.** The  $^{13}\text{C}$  NMR (125 MHz) spectrum of compound **12** in  $\text{CDCl}_3$ .

**Figure S35.** The DEPT spectrum of compound **12**.

**Figure S36.** The HSQC spectrum of compound **12**.

**Figure S37.** The HMBC spectrum of compound **12**.

**Table S1.** Composition of 12 different media used to isolate actinomycetial strains from 13 mangrove soil samples.

| No. | Name                       | Composition                                                                                                                                                                                                                                                                                                                                                                    |
|-----|----------------------------|--------------------------------------------------------------------------------------------------------------------------------------------------------------------------------------------------------------------------------------------------------------------------------------------------------------------------------------------------------------------------------|
| M1  | ISP 2 medium               | Glucose 4.0 g, yeast extract 4.0 g, malt extract 10.0 g, water <sup>a</sup> 1000 mL, agar 15.0 g, pH 7.2-7.4                                                                                                                                                                                                                                                                   |
| M2  | GPT medium                 | Glucose 10.0 g, peptone 5.0 g, tryptone 3.0 g, NaCl 5.0 g, water <sup>a</sup> 1000 mL, agar 15.0 g, pH 7.2-7.4                                                                                                                                                                                                                                                                 |
| M3  | R2A medium                 | R2A agar 18.1 g, water <sup>a</sup> 1000 mL, pH 7.2-7.4                                                                                                                                                                                                                                                                                                                        |
| M4  | TP medium                  | Trehalose 5.0 g, proline 1.0 g, peptone 1.0 g, yeast extract 0.5 g, (NH <sub>4</sub> ) <sub>2</sub> SO <sub>4</sub> 1.0 g, NaCl 1.0 g, CaCl <sub>2</sub> 2.0 g, K <sub>2</sub> HPO <sub>4</sub> 1.0 g, chlorhematin 0.01 mg, MgSO <sub>4</sub> ·7H <sub>2</sub> O 1.0 g, vitamin mixture <sup>d</sup> 1.0 mL, water <sup>a</sup> 1000 mL, agar 15.0 g, pH 7.2-7.4              |
| M5  | ISP 7 medium               | Glycerol 15.0 mL, L-tyrosine 0.5 g, L-asparagine 1.0 g, K <sub>2</sub> HPO <sub>4</sub> 0.5 g, MgSO <sub>4</sub> ·7H <sub>2</sub> O 0.5 g, NaCl 0.5 g, FeSO <sub>4</sub> ·7H <sub>2</sub> O 0.01 g, trace salt solution <sup>e</sup> 1.0 mL, water <sup>a</sup> 1000 mL, agar 15.0 g, pH 7.2-7.4                                                                               |
| M6  | Arginine-glycerol medium   | Arginine 1.0 g, glycerol 6.0 mL, vitamin mixture 1.0 mL, trace salt solution 1.0 mL, water <sup>a</sup> 1000 mL, agar 15.0 g, pH 7.2-7.4                                                                                                                                                                                                                                       |
| M7  | Starch-casein medium       | Soluble starch 10.0 g, casein 0.3 g, KNO <sub>3</sub> 2.0 g, MgSO <sub>4</sub> ·7H <sub>2</sub> O 0.05 g, NaCl 30.0 g, K <sub>2</sub> HPO <sub>4</sub> 2.0 g, CaCO <sub>3</sub> 0.02 g, FeSO <sub>4</sub> ·7H <sub>2</sub> O 0.01 g, water <sup>a</sup> 1000 mL, agar 15.0 g, pH 7.2-7.4                                                                                       |
| M8  | Asparagine-glycerol medium | L-asparagine 1.0 g, glycerol 10.0 mL, K <sub>2</sub> HPO <sub>4</sub> 1.0 g, trace salt solution 1.0 mL, water <sup>a</sup> 1000 mL, agar 15.0 g, pH 7.2-7.4                                                                                                                                                                                                                   |
| M9  | 1/10 ATCC 172 medium       | Soluble starch 2.0 g, glucose 1.0 g, yeast extract 0.5 g, CaCO <sub>3</sub> 1.5 g, N-Z-amine 0.5 g, water <sup>a</sup> 1000 mL, agar 15.0 g, pH 7.2-7.4                                                                                                                                                                                                                        |
| M10 | RH medium                  | Raffinose 10.0 g, L-histidine 1.0 g, K <sub>2</sub> HPO <sub>4</sub> 1.0 g, MgSO <sub>4</sub> 1.0 g, FeSO <sub>4</sub> ·7H <sub>2</sub> O 0.01 g, water <sup>a</sup> 1000 mL, agar 15.0 g, pH 7.2-7.4                                                                                                                                                                          |
| M11 | modified ISP 2 medium      | Glucose 4.0 g, yeast extract 4.0 g, malt extract 10.0 g, <i>Laminaria japonica</i> juice (kelp juice) 15 mL, water <sup>b</sup> 985 mL, agar 15.0 g, pH 7.2-7.4                                                                                                                                                                                                                |
| M12 | modified TP medium         | Trehalose 5.0 g, proline 1.0 g, peptone 1.0 g, yeast extract 0.5 g, (NH <sub>4</sub> ) <sub>2</sub> SO <sub>4</sub> 1.0 g, NaCl 1.0 g, CaCl <sub>2</sub> 2.0 g, K <sub>2</sub> HPO <sub>4</sub> 1.0 g, MgSO <sub>4</sub> ·7H <sub>2</sub> O 1.0 g, chlorhematin 0.01 mg, vitamin mixture 1.0 mL, fresh coconut juice 10 mL, water <sup>c</sup> 990 mL, agar 15.0 g, pH 7.2-7.4 |

<sup>a</sup>water: 900.0 mL distilled water and 100.0 mL sea water; <sup>b</sup>water: 885.0 mL distilled water and 100.0 mL sea water; <sup>c</sup>water: 890.0 mL distilled water and 100.0 mL sea water

<sup>d</sup>vitamin mixture: thiamine (0.10 g); pyridoxine (0.10 g); riboflavin (0.10 g); niacin (0.10 g); biotin (0.10 g); distilled water (100 mL); <sup>e</sup>Trace salt mixture: FeSO<sub>4</sub>·7H<sub>2</sub>O (0.20 g); MnCl<sub>2</sub>·4H<sub>2</sub>O (0.01 g); ZnSO<sub>4</sub>·7H<sub>2</sub>O (0.01 g); distilled water (100 mL).

**Table S2.** Information on genera distribution of actinomycetial strains isolated from 13 different mangrove soil samples.

| Genus                     | S1 | S2 | S3 | S4 | S5 | S6 | S7 | S8 | S9 | S10 | S11 | S12 | S13 | Isolates |
|---------------------------|----|----|----|----|----|----|----|----|----|-----|-----|-----|-----|----------|
| <i>Micromonospora</i>     | 9  | -  | 4  | 4  | 23 | 11 | 10 | 8  | 20 | 13  | 15  | 3   | 1   | 121      |
| <i>Streptomyces</i>       | 34 | 8  | 2  | -  | 15 | -  | 2  | 22 | 6  | 8   | 8   | 4   | 7   | 116      |
| <i>Microbacterium</i>     | 2  | 5  | 4  | 2  | 1  | -  | -  | 7  | 4  | 4   | -   | -   | 7   | 36       |
| <i>Rhodococcus</i>        | 7  | 6  | -  | -  | 11 | -  | -  | 1  | -  | -   | 4   | 4   | 2   | 35       |
| <i>Brachybacterium</i>    | -  | -  | -  | -  | -  | -  | 1  | 1  | 8  | 1   | -   | -   | 17  | 28       |
| <i>Isoptericola</i>       | -  | 1  | -  | -  | -  | -  | -  | -  | 13 | 8   | -   | -   | 3   | 25       |
| <i>Cellulosimicrobium</i> | 3  | 9  | 4  | 1  | 2  | -  | -  | 1  | -  | -   | -   | -   | 1   | 21       |
| <i>Brevibacterium</i>     | 2  | 2  | 2  | 2  | 2  | -  | -  | -  | 2  | 3   | -   | -   | 2   | 17       |
| <i>Serinibacter</i>       | -  | -  | -  | 1  | -  | -  | -  | 3  | 8  | -   | -   | -   | 1   | 13       |
| <i>Agromyces</i>          | -  | 2  | 2  | -  | -  | -  | 1  | 3  | -  | 1   | -   | 1   | -   | 10       |
| <i>Micrococcus</i>        | -  | -  | -  | -  | -  | 1  | -  | 6  | -  | 1   | 1   | 1   | -   | 10       |
| <i>Mycolicibacterium</i>  | 2  | 1  | 2  | -  | -  | -  | -  | 1  | 1  | 2   | -   | -   | 1   | 10       |
| <i>Kocuria</i>            | -  | 1  | 1  | 1  | -  | -  | -  | 3  | 1  | 1   | 1   | -   | -   | 9        |
| <i>Gordonia</i>           | 2  | 3  | -  | -  | -  | -  | -  | 1  | -  | -   | -   | -   | -   | 6        |
| <i>Mycobacterium</i>      | -  | -  | -  | -  | -  | -  | -  | -  | -  | 6   | -   | -   | -   | 6        |
| <i>Aeromicrobium</i>      | 1  | -  | 1  | -  | 1  | 1  | -  | -  | 1  | -   | -   | -   | -   | 5        |
| <i>Arthrobacter</i>       | -  | 1  | -  | -  | -  | -  | 1  | 1  | -  | -   | 1   | 1   | -   | 5        |
| <i>Citricoccus</i>        | -  | -  | -  | 1  | 1  | -  | -  | 3  | -  | -   | -   | -   | -   | 5        |
| <i>Janibacter</i>         | 2  | 1  | 2  | -  | -  | -  | -  | -  | -  | -   | -   | -   | -   | 5        |
| <i>Nocardia</i>           | 2  | -  | 1  | -  | -  | -  | -  | -  | -  | -   | 2   | -   | -   | 5        |
| <i>Corynebacterium</i>    | 2  | -  | 2  | -  | -  | -  | -  | -  | -  | -   | -   | -   | -   | 4        |
| <i>Glutamicibacter</i>    | -  | 1  | 1  | -  | -  | -  | -  | -  | -  | -   | -   | -   | 2   | 4        |
| <i>Agrococcus</i>         | 1  | -  | -  | -  | -  | -  | -  | 2  | -  | -   | -   | -   | -   | 3        |
| <i>Intrasporangium</i>    | 2  | -  | -  | -  | -  | -  | -  | -  | -  | -   | -   | -   | -   | 2        |
| <i>Kineococcus</i>        | -  | -  | -  | -  | -  | -  | -  | -  | 2  | -   | -   | -   | -   | 2        |
| <i>Phycoccus</i>          | -  | -  | -  | -  | -  | -  | -  | -  | -  | -   | -   | -   | 2   | 2        |
| <i>Serinicoccus</i>       | -  | -  | -  | -  | -  | -  | -  | -  | -  | -   | -   | -   | 2   | 2        |
| <i>Sinomonas</i>          | 1  | -  | 1  | -  | -  | -  | -  | -  | -  | -   | -   | -   | -   | 2        |
| <i>Actinomadura</i>       | 1  | -  | -  | -  | -  | -  | -  | -  | -  | -   | -   | -   | -   | 1        |
| <i>Actinopolymorpha</i>   | -  | -  | -  | -  | -  | -  | -  | -  | 1  | -   | -   | -   | -   | 1        |
| <i>Blastococcus</i>       | -  | -  | -  | -  | -  | -  | -  | -  | -  | -   | -   | 1   | -   | 1        |
| <i>Demequina</i>          | -  | -  | -  | -  | -  | -  | -  | -  | -  | -   | -   | -   | 1   | 1        |
| <i>Georgenia</i>          | -  | -  | -  | 1  | -  | -  | -  | -  | -  | -   | -   | -   | -   | 1        |
| <i>Gulosibacter</i>       | 1  | -  | -  | -  | -  | -  | -  | -  | -  | -   | -   | -   | -   | 1        |
| <i>Jonesia</i>            | -  | -  | 1  | -  | -  | -  | -  | -  | -  | -   | -   | -   | -   | 1        |
| <i>Leucobacter</i>        | -  | -  | -  | -  | -  | -  | -  | -  | 1  | -   | -   | -   | -   | 1        |
| <i>Motilibacter</i>       | -  | -  | -  | -  | -  | -  | -  | -  | 1  | -   | -   | -   | -   | 1        |

|                          |    |    |    |    |    |    |    |    |    |    |    |    |    |     |
|--------------------------|----|----|----|----|----|----|----|----|----|----|----|----|----|-----|
| <i>Mumia</i>             | -  | -  | -  | -  | -  | -  | -  | -  | 1  | -  | -  | -  | -  | 1   |
| <i>Salinibacterium</i>   | -  | -  | -  | -  | -  | 1  | -  | -  | -  | -  | -  | -  | -  | 1   |
| <i>Streptacidiphilus</i> | -  | -  | -  | -  | -  | -  | -  | -  | -  | -  | 1  | -  | -  | 1   |
| Isolates                 | 74 | 41 | 30 | 13 | 56 | 14 | 15 | 63 | 70 | 48 | 33 | 15 | 49 | 521 |
| Genera                   | 17 | 13 | 15 | 8  | 8  | 4  | 5  | 15 | 15 | 11 | 8  | 7  | 14 | 40  |

:- No isolate

**Table S3.** Information on genera distribution of actinomycetial strains recovered from 12 different cultural media.

| Genus                     | M1 | M2 | M3 | M4 | M5 | M6 | M7 | M8 | M9 | M10 | M11 | M12 | Isolates |
|---------------------------|----|----|----|----|----|----|----|----|----|-----|-----|-----|----------|
| <i>Micromonospora</i>     | 17 | 23 | 12 | -  | 15 | 7  | 1  | 10 | 12 | 19  | 5   | -   | 121      |
| <i>Streptomyces</i>       | 7  | 6  | 12 | 5  | 21 | 10 | 10 | 18 | 12 | 9   | 5   | 1   | 116      |
| <i>Microbacterium</i>     | 9  | 1  | 4  | -  | 1  | 1  | -  | 1  | 5  | 3   | 10  | 1   | 36       |
| <i>Rhodococcus</i>        | 3  | 4  | 7  | -  | 1  | 5  | 2  | 1  | 3  | 7   | 2   | -   | 35       |
| <i>Brachybacterium</i>    | 3  | 1  | 1  | 3  | 3  | 1  | 4  | 1  | 5  | -   | 6   | -   | 28       |
| <i>Isoptericola</i>       | 7  | 4  | 2  | -  | 4  | -  | -  | -  | 1  | 1   | 6   | -   | 25       |
| <i>Cellulosimicrobium</i> | 3  | 2  | 3  | 1  | 3  | -  | 1  | 1  | 2  | 1   | 3   | 1   | 21       |
| <i>Brevibacterium</i>     | -  | 2  | 3  | 2  | 2  | 2  | -  | -  | 4  | -   | -   | 2   | 17       |
| <i>Serinibacter</i>       | 2  | 1  | 1  | 1  | -  | 1  | -  | 2  | 3  | 1   | 1   | -   | 13       |
| <i>Mycolicibacterium</i>  | 3  | 2  | -  | -  | -  | -  | -  | 3  | -  | -   | 2   | -   | 10       |
| <i>Micrococcus</i>        | -  | 2  | -  | -  | -  | 3  | -  | 1  | -  | -   | 3   | 1   | 10       |
| <i>Agromyces</i>          | 1  | -  | 2  | -  | -  | 1  | 4  | -  | -  | -   | 1   | 1   | 10       |
| <i>Kocuria</i>            | -  | -  | -  | -  | 1  | -  | -  | -  | -  | 1   | 4   | 3   | 9        |
| <i>Mycobacterium</i>      | 2  | -  | 1  | -  | -  | -  | -  | -  | -  | -   | 3   | -   | 6        |
| <i>Gordonia</i>           | -  | 2  | 1  | -  | -  | -  | -  | -  | 1  | 1   | 1   | -   | 6        |
| <i>Aeromicrobium</i>      | -  | 1  | 2  | -  | 1  | -  | -  | -  | -  | -   | 1   | -   | 5        |
| <i>Arthrobacter</i>       | 1  | 1  | -  | -  | -  | 2  | -  | -  | -  | -   | -   | 1   | 5        |
| <i>Citricoccus</i>        | 1  | -  | -  | -  | -  | 2  | -  | -  | -  | -   | -   | 2   | 5        |
| <i>Janibacter</i>         | -  | -  | 1  | 1  | 1  | -  | 1  | -  | -  | -   | 1   | -   | 5        |
| <i>Nocardia</i>           | 2  | -  | 1  | -  | -  | -  | -  | 1  | -  | -   | 1   | -   | 5        |
| <i>Corynebacterium</i>    | 1  | -  | 1  | -  | -  | -  | 1  | -  | -  | -   | 1   | -   | 4        |
| <i>Glutamicibacter</i>    | -  | -  | 1  | -  | -  | -  | -  | -  | -  | -   | -   | 3   | 4        |
| <i>Agrococcus</i>         | -  | 1  | -  | -  | -  | 1  | 1  | -  | -  | -   | -   | -   | 3        |
| <i>Intrasporangium</i>    | -  | -  | -  | -  | 1  | 1  | -  | -  | -  | -   | -   | -   | 2        |
| <i>Kineococcus</i>        | 1  | 1  | -  | -  | -  | -  | -  | -  | -  | -   | -   | -   | 2        |
| <i>Phycococcus</i>        | -  | -  | -  | -  | -  | -  | -  | -  | -  | -   | 2   | -   | 2        |
| <i>Sinomonas</i>          | 1  | -  | -  | -  | 1  | -  | -  | -  | -  | -   | -   | -   | 2        |
| <i>Serinicoccus</i>       | -  | -  | -  | -  | -  | -  | -  | -  | -  | -   | 2   | -   | 2        |
| <i>Actinomadura</i>       | -  | -  | 1  | -  | -  | -  | -  | -  | -  | -   | -   | -   | 1        |
| <i>Actinopolymorpha</i>   | -  | -  | -  | -  | 1  | -  | -  | -  | -  | -   | -   | -   | 1        |
| <i>Blastococcus</i>       | -  | -  | -  | -  | -  | -  | -  | -  | -  | -   | 1   | -   | 1        |
| <i>Demequina</i>          | -  | -  | -  | -  | -  | -  | -  | -  | -  | -   | 1   | -   | 1        |
| <i>Georgenia</i>          | -  | -  | -  | -  | -  | -  | -  | -  | -  | -   | -   | 1   | 1        |
| <i>Gulosibacter</i>       | -  | -  | -  | -  | -  | -  | -  | -  | 1  | -   | -   | -   | 1        |

|                          |    |    |    |    |    |    |    |    |    |    |    |    |     |
|--------------------------|----|----|----|----|----|----|----|----|----|----|----|----|-----|
| <i>Jonesia</i>           | -  | -  | -  | -  | -  | -  | -  | -  | -  | -  | -  | 1  | 1   |
| <i>Leucobacter</i>       | -  | -  | -  | -  | -  | -  | -  | -  | 1  | -  | -  | -  | 1   |
| <i>Motilibacter</i>      | -  | 1  | -  | -  | -  | -  | -  | -  | -  | -  | -  | -  | 1   |
| <i>Mumia</i>             | 1  | -  | -  | -  | -  | -  | -  | -  | -  | -  | -  | -  | 1   |
| <i>Salinibacterium</i>   | -  | -  | -  | -  | -  | -  | -  | -  | -  | -  | 1  | -  | 1   |
| <i>Streptacidiphilus</i> | -  | -  | -  | -  | 1  | -  | -  | -  | -  | -  | -  | -  | 1   |
| Isolates                 | 65 | 55 | 56 | 13 | 57 | 37 | 25 | 39 | 50 | 43 | 63 | 18 | 521 |
| Genera                   | 18 | 17 | 18 | 6  | 15 | 13 | 9  | 10 | 12 | 9  | 23 | 12 | 40  |

---

-: No isolate

**Table S4.** Antibacterial activities of 179 actinomycetal strains by the paper disc diffusion method.

[illegible]



[illegible]

|                 |                                                                                               |    |    |   |   |    |    |    |   |    |    |    |    |
|-----------------|-----------------------------------------------------------------------------------------------|----|----|---|---|----|----|----|---|----|----|----|----|
| M76 (MW724585)  | <i>Janibacter indicus</i> CGMCC 1.12511 <sup>T</sup> (99.88)                                  | -  | -  | - | - | -  | -  | -  | - | -  | -  | -  | -  |
| M81 (MW724586)  | <i>Citricoccus alkalitolerans</i> YIM 70010 <sup>T</sup> (99.63)                              | -  | -  | - | - | -  | -  | -  | - | -  | -  | -  | -  |
| M84 (MW724587)  | <i>Micromonospora auratinigra</i> DSM 44815 <sup>T</sup> (99.07)                              | -  | -  | - | - | -  | -  | -  | - | -  | -  | -  | -  |
| M86 (MW724588)  | <i>Aeromicrobium tamense</i> SSW1-57 <sup>T</sup> (99.87)                                     | -  | -  | - | - | -  | -  | -  | - | -  | -  | -  | -  |
| M90 (MW724589)  | <i>Kocuria dechangensis</i> NEAU-ST5-33 <sup>T</sup> (99.09)                                  | -  | -  | - | - | -  | -  | -  | - | -  | -  | -  | -  |
| M91 (MW724590)  | <i>Brevibacterium permense</i> VKM AC-2280 <sup>T</sup> (99.87)                               | -  | -  | - | - | -  | -  | -  | - | -  | -  | -  | -  |
| M102 (MW724591) | <i>Arthrobacter gandavensis</i> R812 <sup>T</sup> (99.60)                                     | -  | -  | - | - | -  | -  | -  | - | -  | -  | -  | -  |
| M104 (MW724592) | <i>Streptomyces griseoflavus</i> LMG 19344 <sup>T</sup> (99.75)                               | -  | -  | - | - | -  | -  | -  | - | -  | -  | -  | -  |
| M106 (MW724593) | <i>Streptomyces geysiriensis</i> NBRC 15413 <sup>T</sup> (99.75)                              | 14 | 9  | 7 | - | 16 | -  | 10 | 8 | 14 | 20 | 11 | 13 |
| M107 (MW724594) | <i>Streptomyces andamanensis</i> KC-112 <sup>T</sup> (99.75)                                  | -  | -  | - | - | -  | -  | -  | - | 7  | 7  | -  | -  |
| M108 (MW724595) | <i>Phycococcus endophyticus</i> IP6SC6 <sup>T</sup> (98.61)                                   | -  | -  | - | - | -  | -  | -  | - | -  | -  | -  | -  |
| M110 (MW724596) | <i>Agromyces tropicus</i> CM9-9 <sup>T</sup> (99.88)                                          | -  | -  | - | - | -  | -  | -  | - | -  | -  | -  | -  |
| M111 (MW724597) | <i>Streptomyces smyrnaeus</i> SM3501 <sup>T</sup> (99.74)                                     | -  | -  | - | - | 9  | -  | -  | - | 13 | 16 | 17 | 15 |
| M112 (MW724598) | <i>Micromonospora globispora</i> S2901 <sup>T</sup> (99.63)                                   | -  | -  | - | - | -  | -  | -  | - | -  | -  | -  | -  |
| M118 (MW724599) | <i>Microbacterium hominis</i> NBRC 15708 <sup>T</sup> (98.91)                                 | -  | -  | - | - | -  | -  | -  | - | -  | -  | -  | -  |
| M129 (MW724600) | <i>Streptomyces nanshensis</i> SCSIO 01066 <sup>T</sup> (99.63)                               | -  | -  | - | - | -  | -  | -  | - | -  | -  | -  | -  |
| M131 (MW724601) | <i>Cellulosimicrobium marinum</i> RS-7-4 <sup>T</sup> (100.00)                                | -  | -  | - | - | -  | -  | -  | - | -  | -  | -  | -  |
| M133 (MW724602) | <i>Blastococcus aggregatus</i> DSM 4725 <sup>T</sup> (99.61)                                  | -  | -  | - | - | -  | -  | -  | - | -  | -  | -  | -  |
| Y2 (MW724603)   | <i>Streptomyces hygroscopicus</i> subsp. <i>hygroscopicus</i> NBRC 13472 <sup>T</sup> (99.63) | -  | -  | - | - | -  | -  | -  | - | 16 | 21 | 18 | 23 |
| Y3 (MW724604)   | <i>Streptomyces aurantiogriseus</i> NBRC 12842 <sup>T</sup> (99.40)                           | -  | -  | - | - | -  | -  | -  | - | 7  | 8  | -  | -  |
| Y4 (MW724605)   | <i>Streptomyces albogriseolus</i> NRRL B-1305 <sup>T</sup> (100.00)                           | 12 | 13 | - | - | 17 | 10 | 10 | 9 | 17 | 26 | -  | 16 |
| Y8 (MW724606)   | <i>Streptomyces pseudogriseolus</i> NRRL B-3288 <sup>T</sup> (100.00)                         | -  | -  | - | - | -  | -  | -  | - | 7  | -  | 11 | -  |
| Y9 (MW724607)   | <i>Streptomyces pluripotens</i> MUSC 135 <sup>T</sup> (99.87)                                 | 14 | 17 | 7 | 8 | 16 | -  | 17 | - | 16 | 23 | -  | -  |
| Y13 (MW724608)  | <i>Streptomyces qinglanensis</i> 172205 <sup>T</sup> (100.00)                                 | -  | -  | - | - | -  | -  | -  | - | 8  | 8  | 14 | -  |
| Y14 (MW724609)  | <i>Streptomyces coelicoflavus</i> NBRC 15399 <sup>T</sup> (100.00)                            | -  | -  | - | - | -  | -  | -  | - | -  | -  | 10 | -  |
| Y15 (MW724610)  | <i>Streptomyces cellulosae</i> NBRC 13027 <sup>T</sup> (100.00)                               | -  | -  | - | - | -  | -  | -  | - | 8  | 11 | -  | 13 |

[illegible]

[illegible]

[illegible]

[illegible]

|                      |                                                                 |  |    |    |    |    |    |    |    |    |    |    |    |   |
|----------------------|-----------------------------------------------------------------|--|----|----|----|----|----|----|----|----|----|----|----|---|
| M116 (MW724713)      | <i>Serinicoccus profundus</i> MCCC 1A05965 <sup>T</sup> (98.69) |  | -  | -  | -  | -  | -  | -  | -  | -  | -  | -  |    |   |
| Methanol             |                                                                 |  | -  | -  | -  | -  | -  | -  | -  | -  | -  | -  |    |   |
| Levofloxacin (10 µg) |                                                                 |  | 36 | 39 | 26 | 19 | 40 | 24 | 28 | 23 | 24 | 15 | 19 | - |

Paper disk diameter, 6 mm; -, no Inhibitory zone.

**Table S5.** The trioxacarcin-type antibiotics isolated from actinomycetial strains.

| Name                 | UVmax (nm)        | Exact mass | Molecular Formula                                              | Ref.  |
|----------------------|-------------------|------------|----------------------------------------------------------------|-------|
| LL-D49194 $\alpha$ 1 | 230, 270, 399     | 992        | C <sub>48</sub> H <sub>64</sub> O <sub>22</sub>                | [1,2] |
| LL-D49194 $\beta$ 1  | 230, 270, 399     | 1010       | C <sub>48</sub> H <sub>66</sub> O <sub>23</sub>                | [1,2] |
| LL-D49194 $\beta$ 2  | 230, 270, 399     | 950        | C <sub>46</sub> H <sub>62</sub> O <sub>21</sub>                | [1,2] |
| LL-D49194 $\beta$ 3  | 230, 270, 399     | 806        | C <sub>39</sub> H <sub>50</sub> O <sub>18</sub>                | [1]   |
| LL-D49194 $\gamma$   | 225, 270, 399(sh) | -          | -                                                              | [1]   |
| LL-D49194 $\delta$   | 230, 270, 399     | -          | -                                                              | [1]   |
| LL-D49194 $\epsilon$ | 230, 270, 399     | 1052       | C <sub>50</sub> H <sub>68</sub> O <sub>24</sub>                | [1]   |
| LL-D49194 $\zeta$    | 230, 270, 399     | -          | -                                                              | [1]   |
| LL-D49194 $\eta$     | 230, 270, 399     | 848        | C <sub>41</sub> H <sub>52</sub> O <sub>19</sub>                | [1]   |
| LL-D49194 $\omega$ 1 | 230, 270, 399     | 968        | C <sub>46</sub> H <sub>64</sub> O <sub>22</sub>                | [1]   |
| LL-D49194 $\omega$ 2 | 230, 270, 399     | -          | -                                                              | [1]   |
| LL-D49194 $\omega$ 3 | 230, 270, 399     | 866        | C <sub>41</sub> H <sub>54</sub> O <sub>20</sub>                | [1]   |
| Parimycin            | 260, 423, 447     | 396        | C <sub>22</sub> H <sub>20</sub> O <sub>7</sub>                 | [3]   |
| trioxacarcin A       | 233, 271, 399     | 876        | C <sub>42</sub> H <sub>52</sub> O <sub>20</sub>                | [4,5] |
| trioxacarcin B       | 233, 271, 399     | 894        | C <sub>42</sub> H <sub>54</sub> O <sub>21</sub>                | [4,5] |
| trioxacarcin C       | 233, 271, 399     | 878        | C <sub>42</sub> H <sub>54</sub> O <sub>20</sub>                | [4,5] |
| trioxacarcin D       | 270, 396          | 834        | C <sub>40</sub> H <sub>50</sub> O <sub>19</sub>                | [5]   |
| trioxacarcin E       | -                 | 740        | C <sub>34</sub> H <sub>44</sub> O <sub>18</sub>                | [5]   |
| trioxacarcin F       | -                 | 912        | C <sub>42</sub> H <sub>56</sub> O <sub>22</sub>                | [5]   |
| Gutingimycin         | 269, 399          | 1027       | C <sub>47</sub> H <sub>57</sub> N <sub>5</sub> O <sub>21</sub> | [5,6] |
| DC-45-A1             | -                 | 704        | C <sub>34</sub> H <sub>40</sub> O <sub>16</sub>                | [7-9] |
| DC-45-A2             | -                 | 518        | C <sub>25</sub> H <sub>26</sub> O <sub>12</sub>                | [7-9] |

-: no data



**Table S6.** The information of mangrove-derived soil samples in different sites of Leizhou Peninsula, China.

| Samples   | Sampling sites                            | The characteristic of soil                        | Longitude (E) | Latitude (N) | Sampling depth        |
|-----------|-------------------------------------------|---------------------------------------------------|---------------|--------------|-----------------------|
| Sample 1  | He'an Town, Xuwen County                  | Rhizosphere soil of <i>Sonneratia apetala</i>     | 110.3708830   | 20.6395330   | 5-10 cm under surface |
| Sample 2  | He'an Town, Xuwen County                  | Rhizosphere soil of <i>Sonneratia apetala</i>     | 110.3708830   | 20.6396330   | 5-10 cm under surface |
| Sample 3  | He'an Town, Xuwen County                  | Rhizosphere soil of <i>Aegiceras corniculatum</i> | 110.3709170   | 20.6395830   | 5-10 cm under surface |
| Sample 4  | Dongsong Island, He'an Town, Xuwen County | Rhizosphere soil of <i>Avicennia marina</i>       | 110.3666000   | 20.6785170   | 5-10 cm under surface |
| Sample 5  | Dongsong Island, He'an Town, Xuwen County | Rhizosphere soil of <i>Rhizophora stylosa</i>     | 110.3665170   | 20.6787170   | 5-10 cm under surface |
| Sample 6  | Dongsong Island, He'an Town, Xuwen County | Rhizosphere soil of <i>Kandelia candel</i>        | 110.3665330   | 20.6787170   | 5-10 cm under surface |
| Sample 7  | Dongsong Island, He'an Town, Xuwen County | Muddy soil of intertidal zone in mangrove         | 110.3674500   | 20.6799330   | 5-10 cm under surface |
| Sample 8  | Dongsong Island, He'an Town, Xuwen County | Rhizosphere soil of <i>Sonneratia apetala</i>     | 110.3686330   | 20.6665330   | 5-10 cm under surface |
| Sample 9  | Maichen Town, Xuwen County                | Rhizosphere soil of <i>Rhizophora stylosa</i>     | 110.0107830   | 20.4205000   | 5-10 cm under surface |
| Sample 10 | Maichen Town, Xuwen County                | Rhizosphere soil of <i>Avicennia marina</i>       | 110.0107670   | 20.4205670   | 5-10 cm under surface |
| Sample 11 | Techeng Island, Xiashan District          | Rhizosphere soil of <i>Avicennia marina</i>       | 110.4404500   | 21.1553670   | 5-10 cm under surface |
| Sample 12 | Techeng Island, Xiashan District          | Rhizosphere soil of <i>Avicennia marina</i>       | 110.4403830   | 21.1554000   | 5-10 cm under surface |
| Sample 13 | Techeng Island, Xiashan District          | Rhizosphere soil of <i>Avicennia marina</i>       | 110.4413500   | 21.1574500   | 5-10 cm under surface |

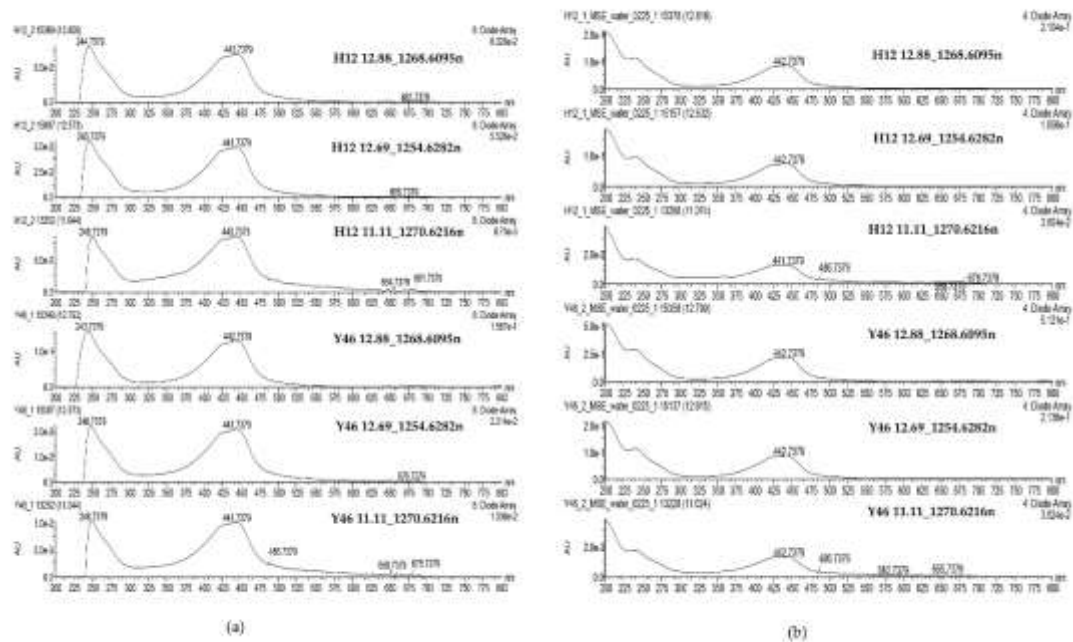

**Figure S1.** The UV spectra of three outliers (1-3) of samples Y46 and H12. (a) LC condition: ACN and water containing 0.1% HCOOH; (b) LC condition: ACN and water





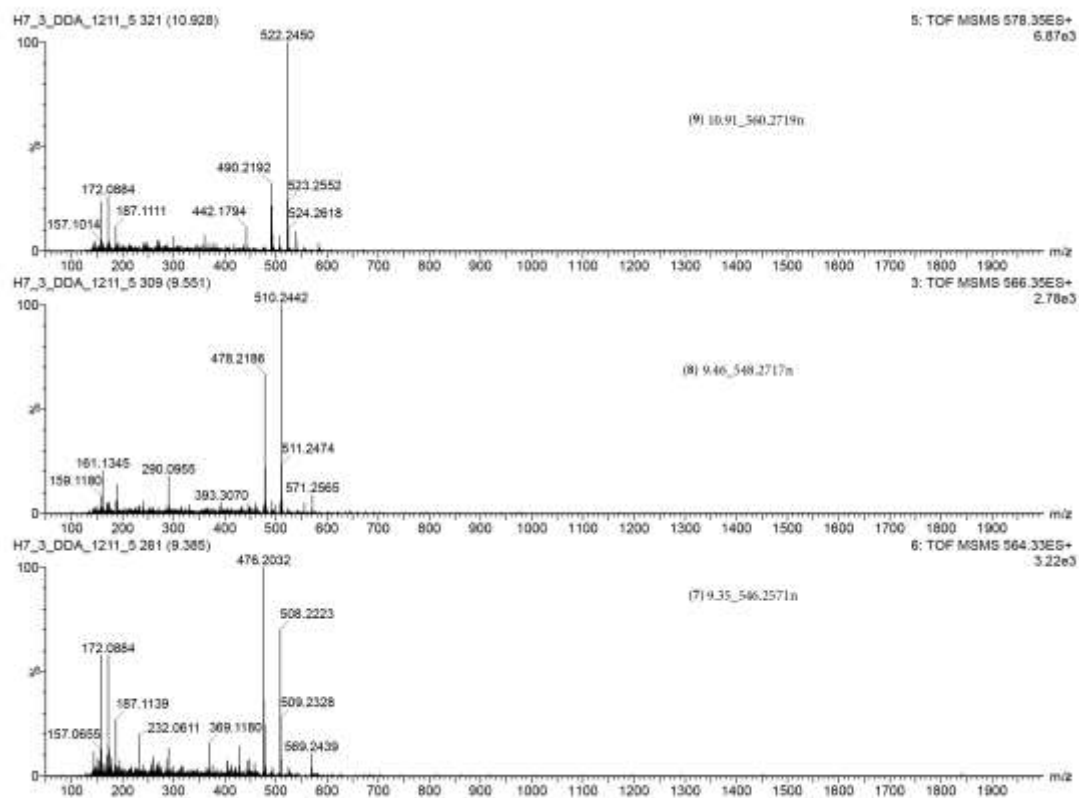

**Figure S5.** The MS/MS spectra of three revised compounds (7-9) in H7 acquired by DDA method.

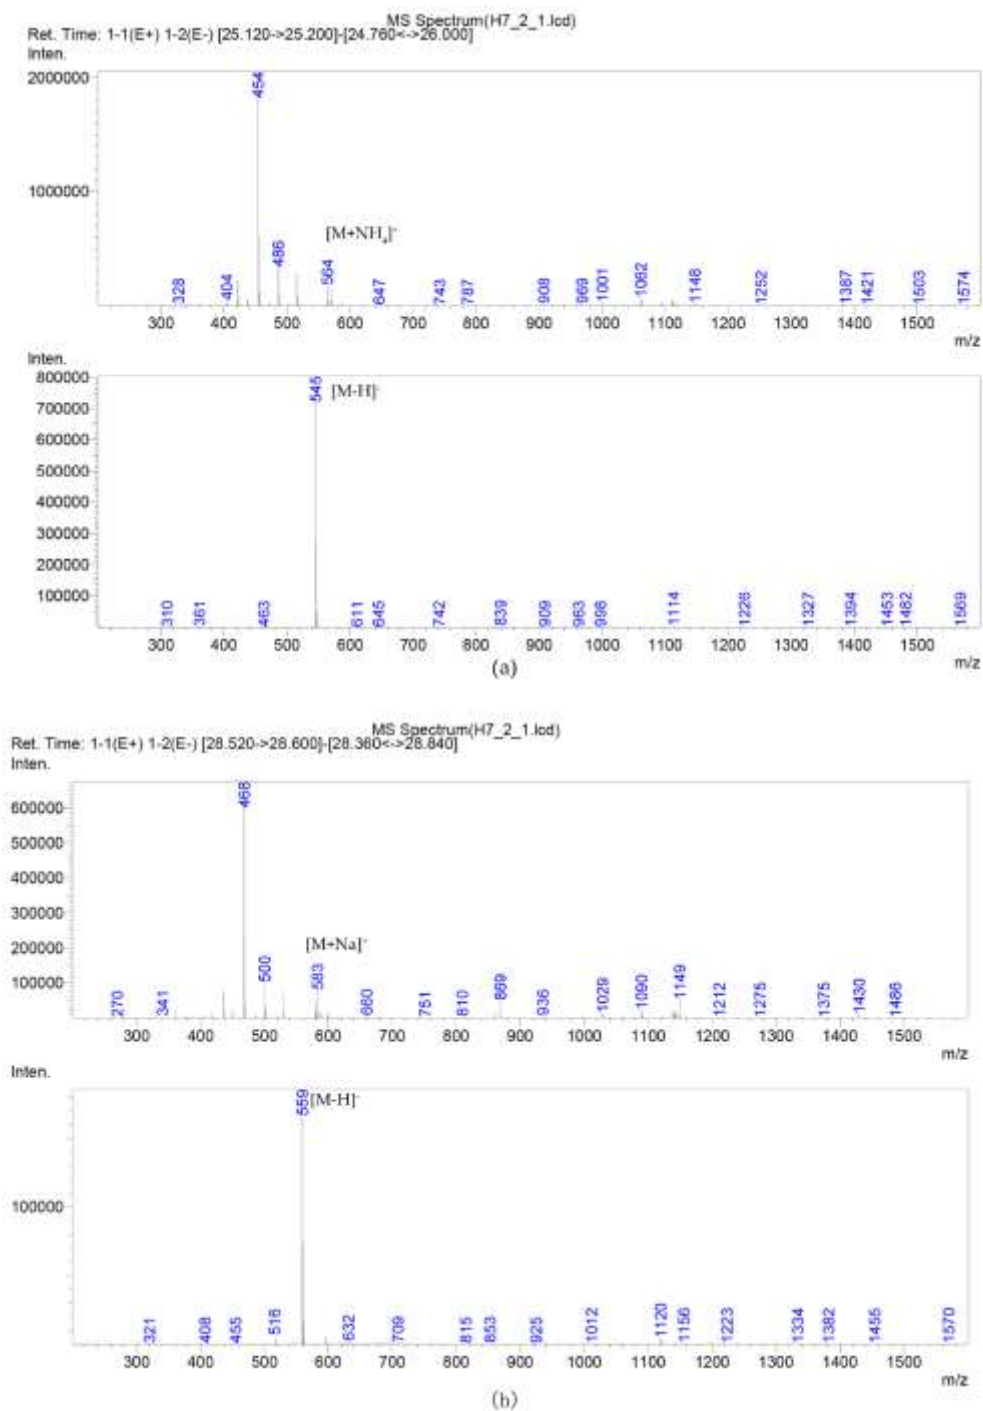

**Figure S6.** The positive and negative MS spectra of two revised compounds in the LC-MS of H7 (a: 9.35\_546.2571n (7); b: 10.91\_560.2719n (9)).

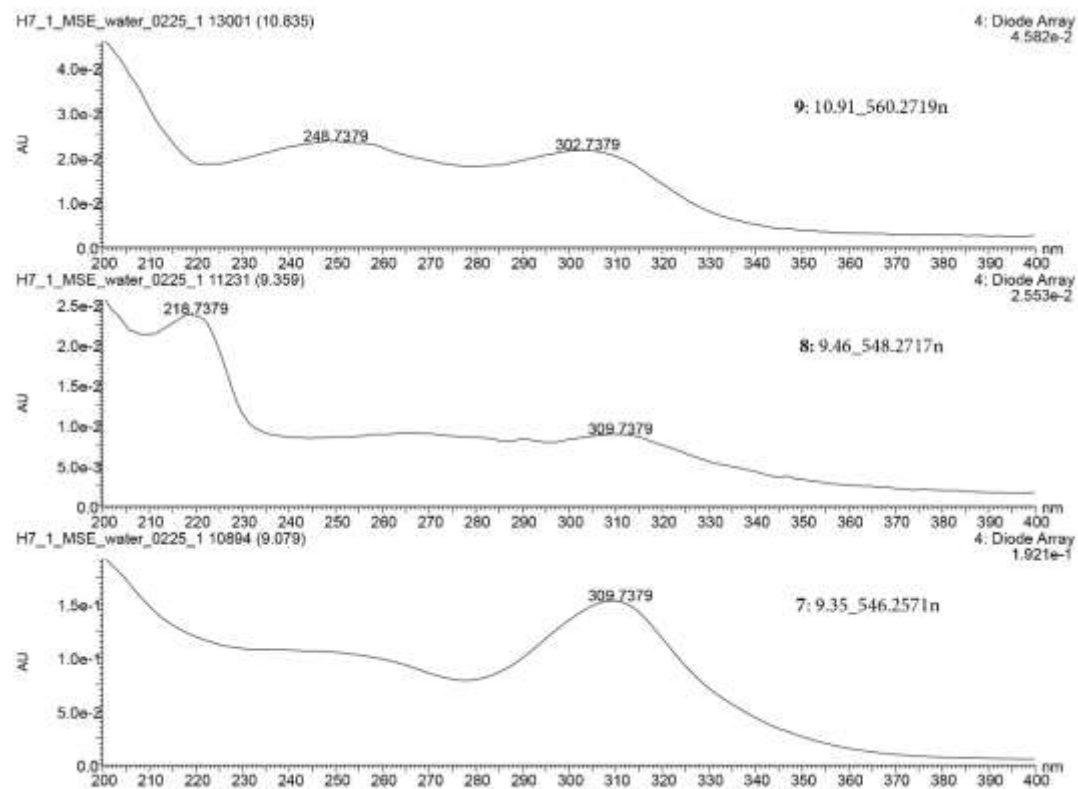

**Figure S7.** The UV spectra of three compounds 7-9 of the H7 eluting with ACN-H<sub>2</sub>O (7: 9.35\_546.2571n; 8: 9.46\_548.2717n; 9: 10.91\_560.2719n).

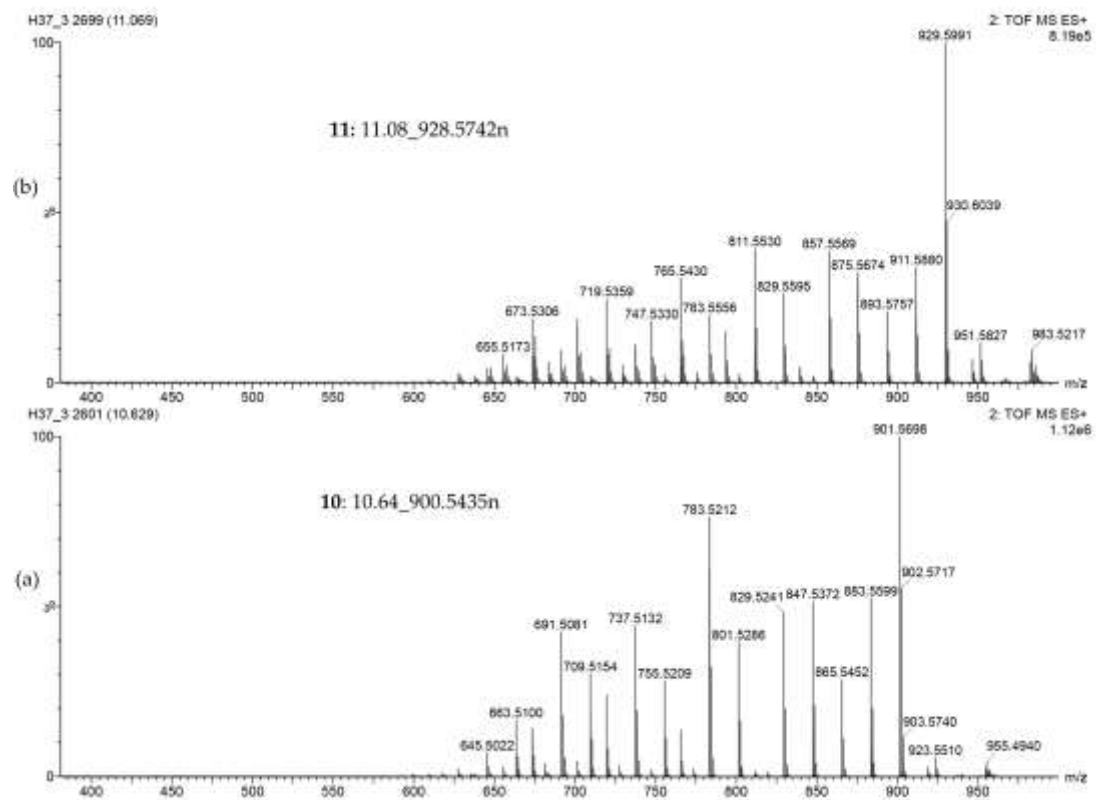

**Figure S8.** The MS/MS spectra of two compounds in H37 acquired by MSE method (a, 10.64\_900.5435n (10); b, 11.08\_928.5742n (11)).



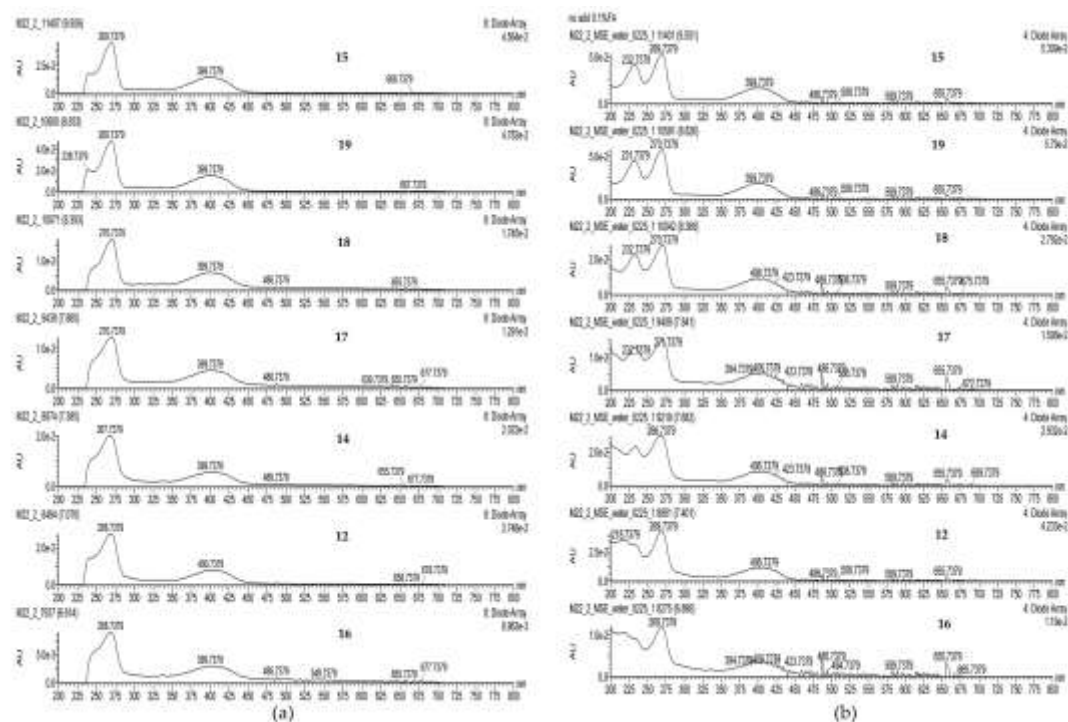

**Figure S9.** The UV spectra of seven trioxacarcin-type compounds in the UPLC-UV-HRMS chromatograms of M22. (a, LC conditions: ACN and H<sub>2</sub>O containing with 0.1% HCOOH; b, LC conditions: ACN and H<sub>2</sub>O; **12**, 7.16\_1028.3600m/z; **14**, 7.47\_1028.3592m/z; **15**, 9.55\_876.2958n, trioxacarcin A; **16**, 6.69\_1030.3751m/z; **17**, 7.94\_1013.3486m/z; **18**, 8.43\_894.3132n, trioxacarcin B; **19**, 8.89\_878.3168n, trioxacarcin C).

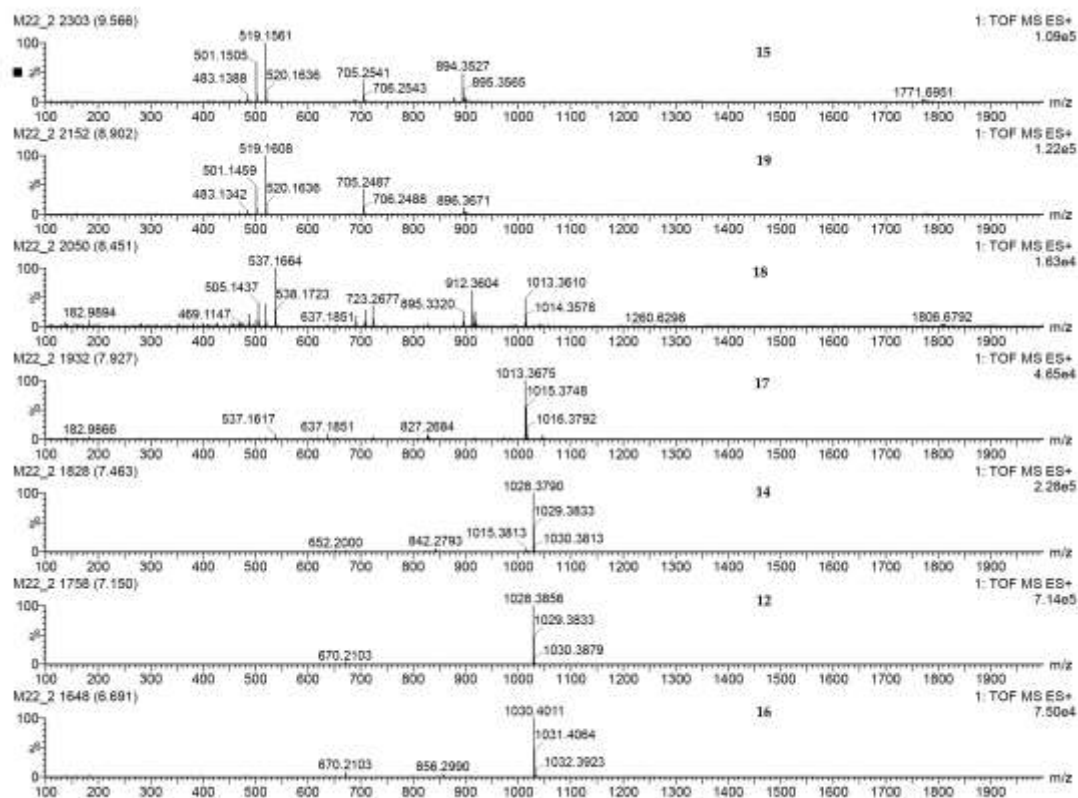

**Figure S10.** The MS spectra of seven trioxacarcin-type compounds in the UPLC-UV-HRMS chromatograms of M22. (**12**, 7.16\_1028.3600 $m/z$ ; **14**, 7.47\_1028.3592 $m/z$ ; **15**, 9.55\_876.2958n, trioxacarcin A; **16**, 6.69\_1030.3751 $m/z$ ; **17**, 7.94\_1013.3486 $m/z$ ; **18**, 8.43\_894.3132n, trioxacarcin B; **19**, 8.89\_878.3168n, trioxacarcin C).

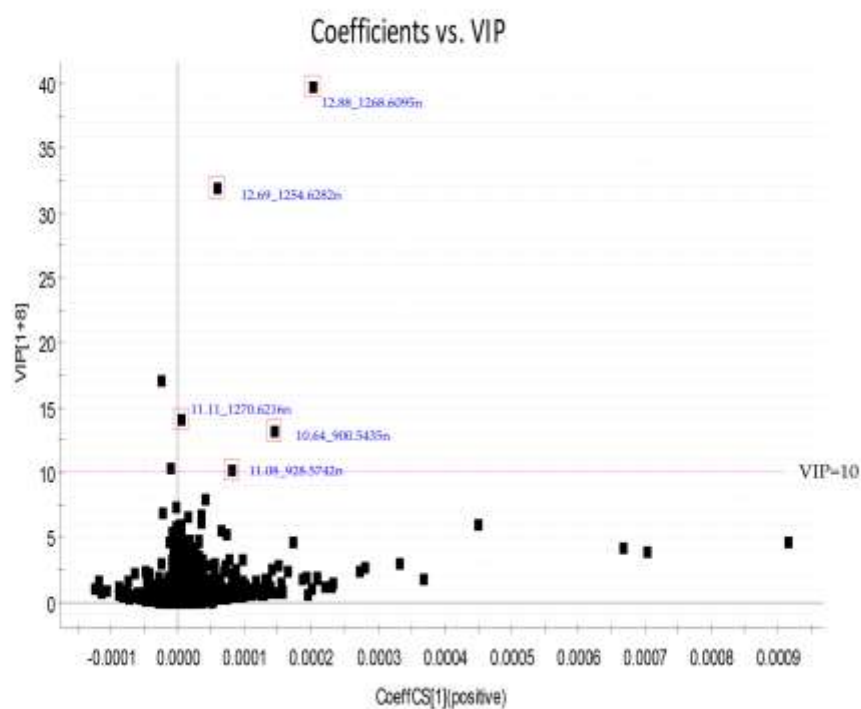

**Figure S11.** The VIP score of selected markers in the OPLS-DA model.

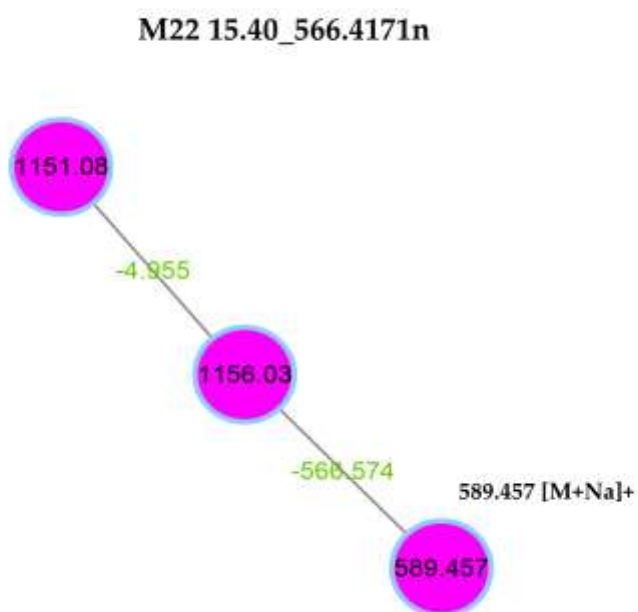

**Figure S12.** Molecular network of the cluster containing the compound 15.40\_566.4171n (**13**) in M22 extract.

H37 10.64\_900.5435n and 11.08\_928.5742n

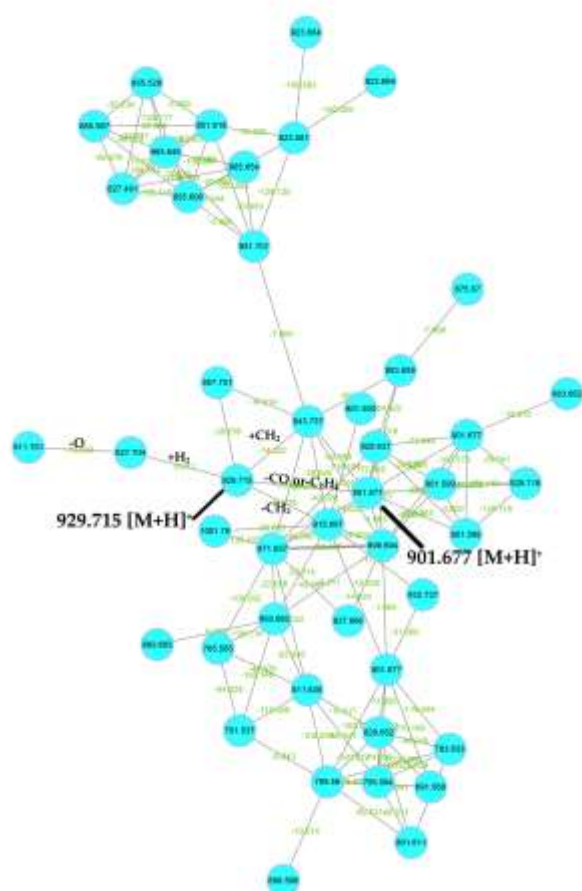

**Figure S13.** Molecular network of the cluster containing the compounds 10.64\_900.5435n (**10**) and 11.08\_928.5742n (**11**) in H37 extract.

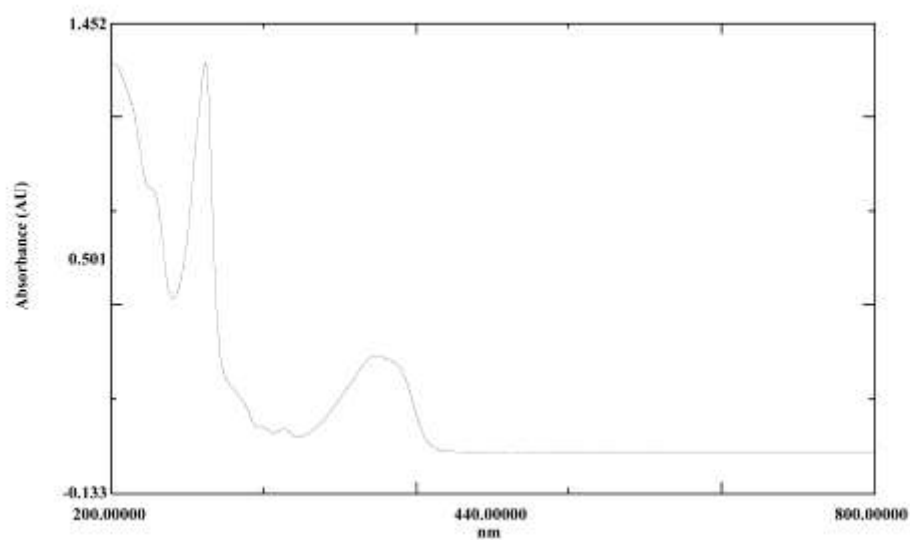

**Figure S14.** The UV spectrum of compound **16**

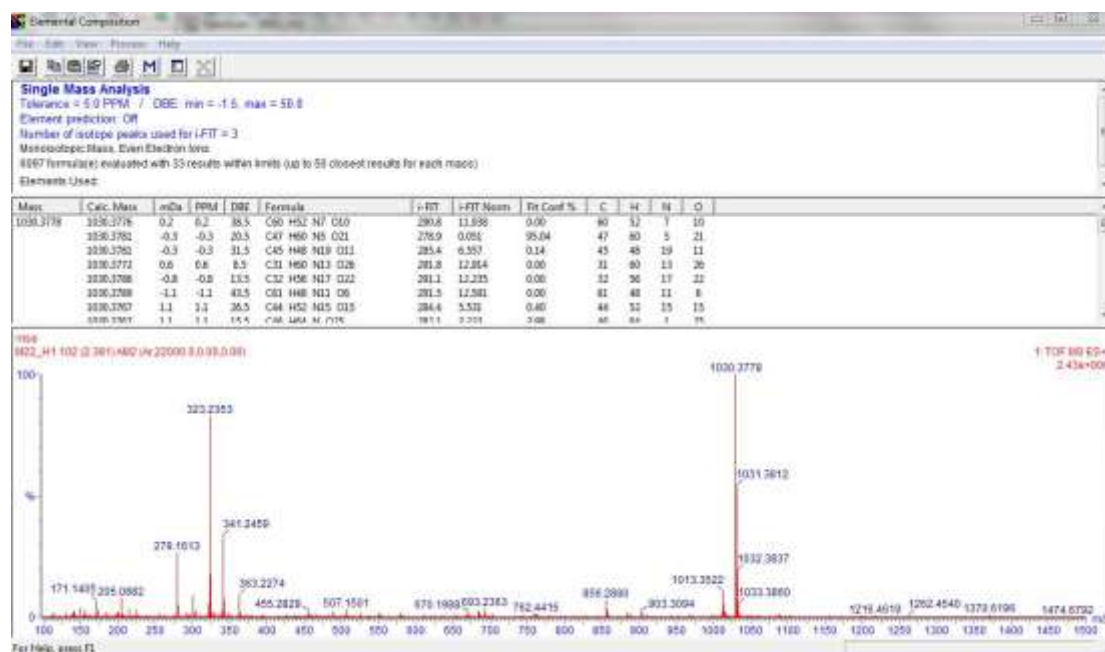

Figure S15. The HRESIMS of compound 16

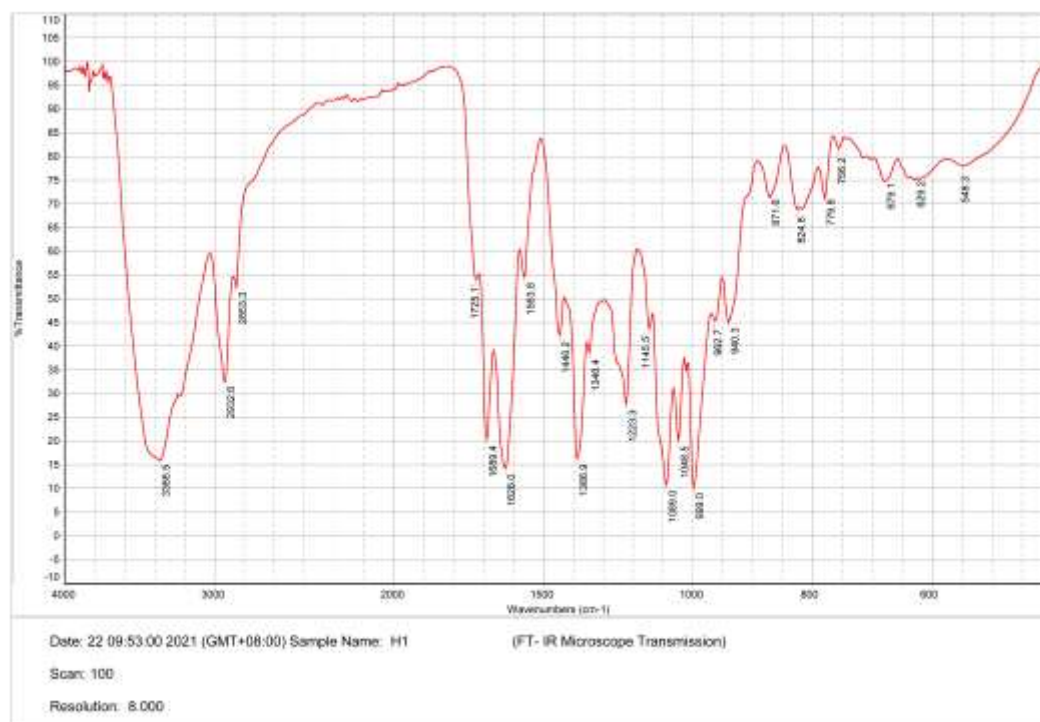

Figure S16. The IR spectrum of compound 16

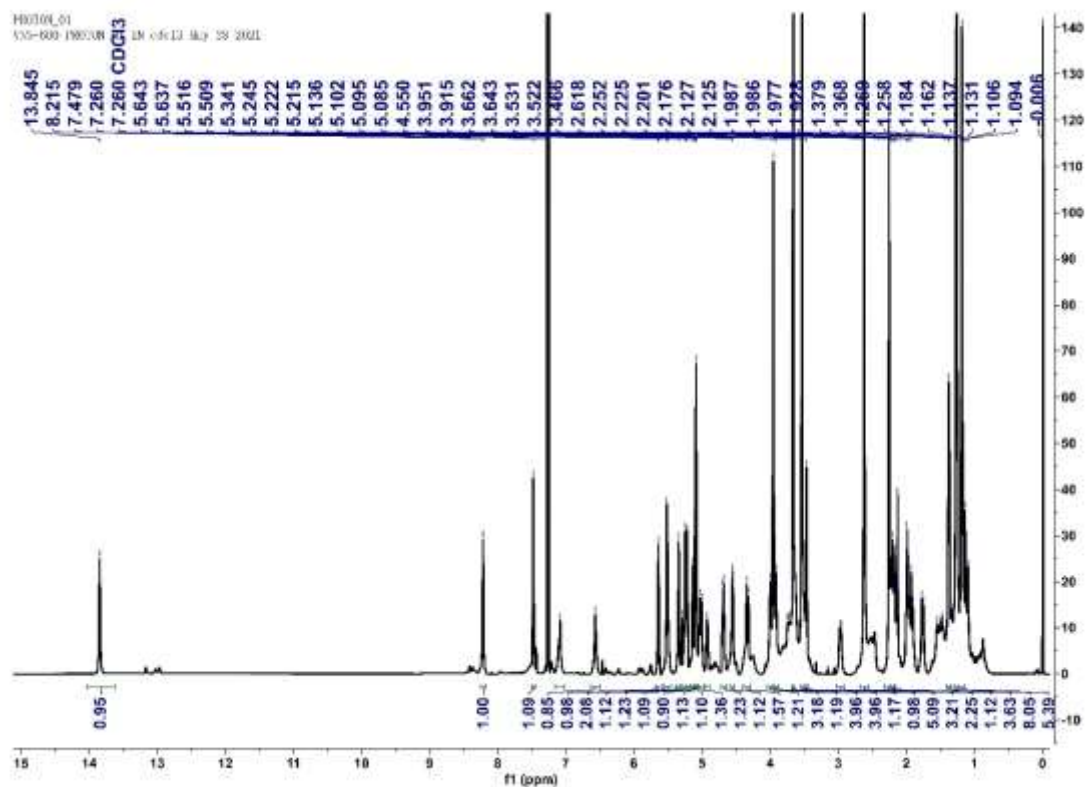

Figure S17. The <sup>1</sup>H NMR (600 MHz) spectrum of compound **16** in CDCl<sub>3</sub>

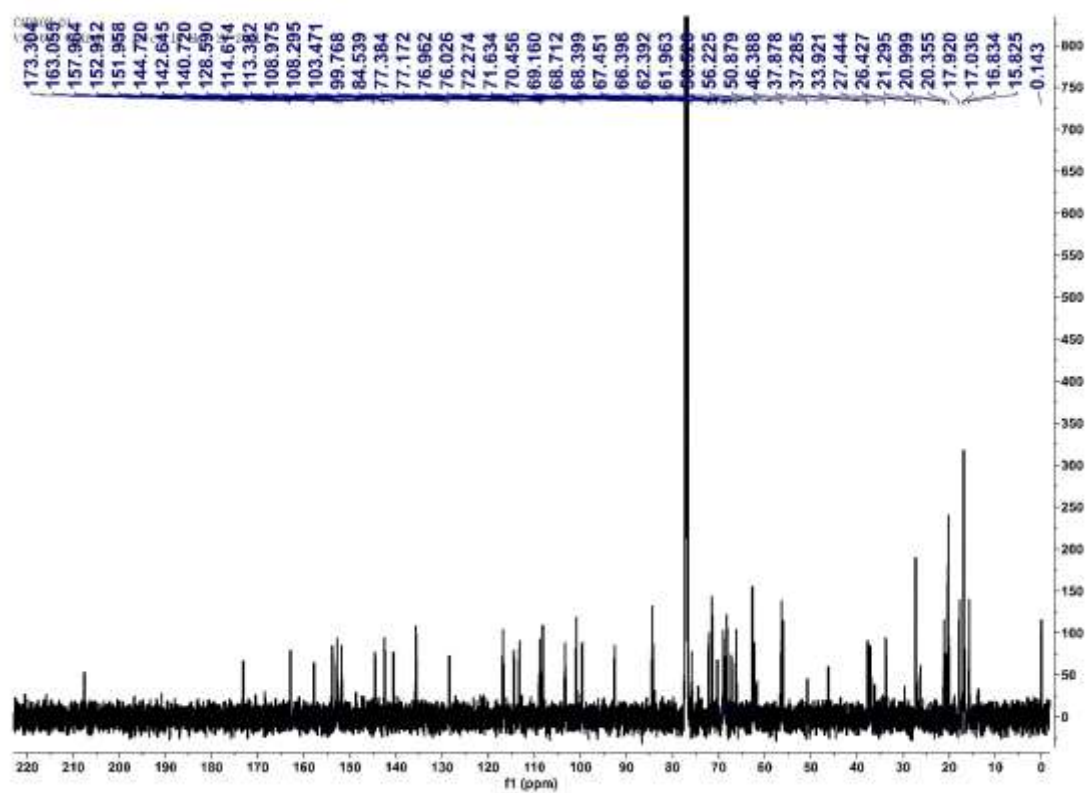

Figure S18. The <sup>13</sup>C NMR (150 MHz) spectrum of compound **16** in CDCl<sub>3</sub>

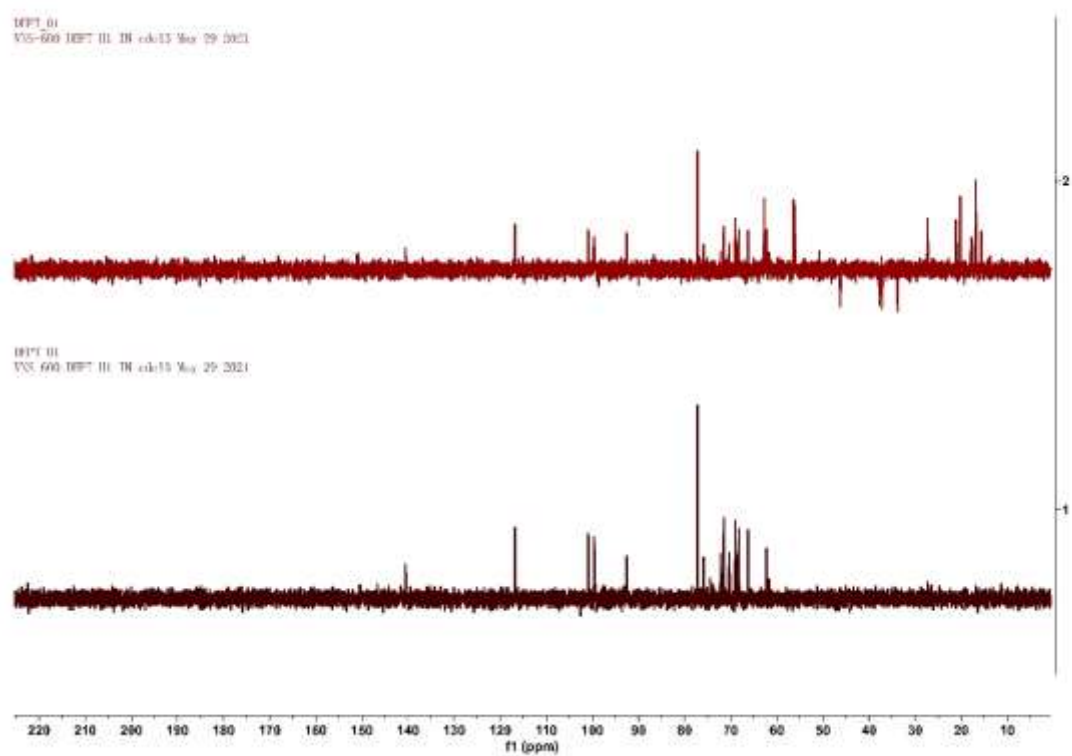

Figure S19. The DEPT spectrum of compound 16

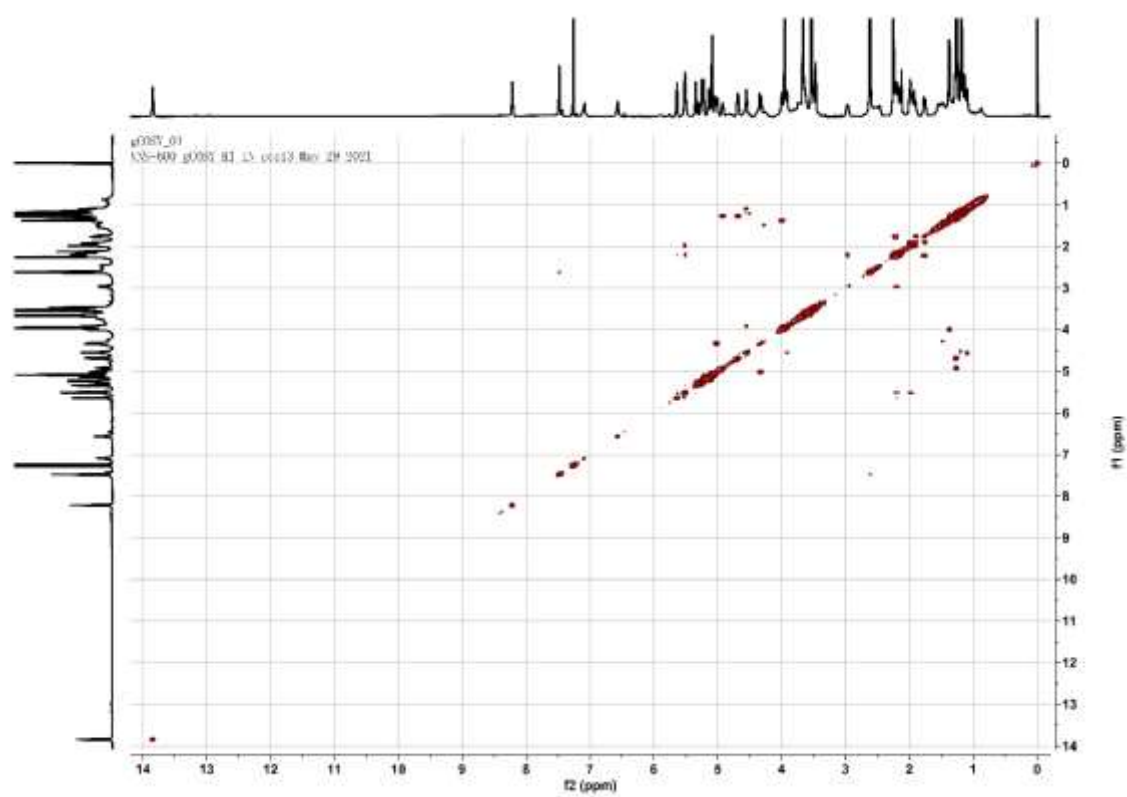

Figure S20. The  $^1\text{H}$ - $^1\text{H}$  COSY spectrum of compound 16

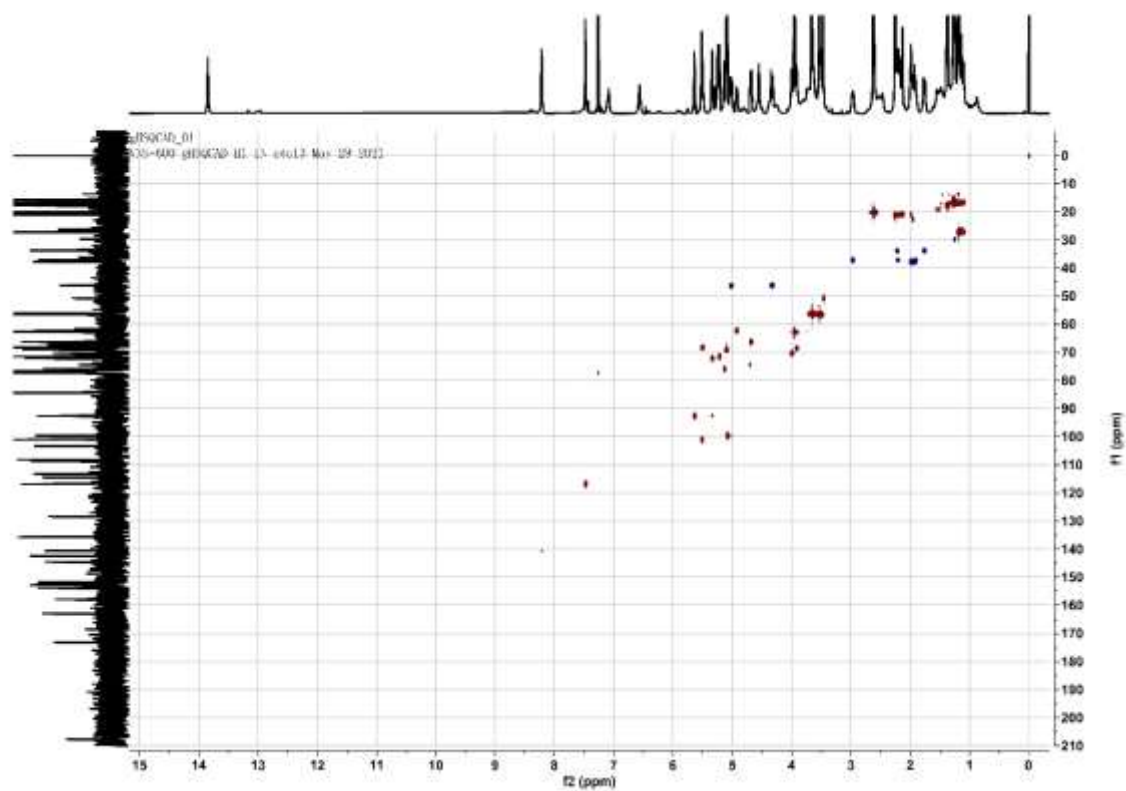

Figure S21. The HSQC spectrum of compound 16

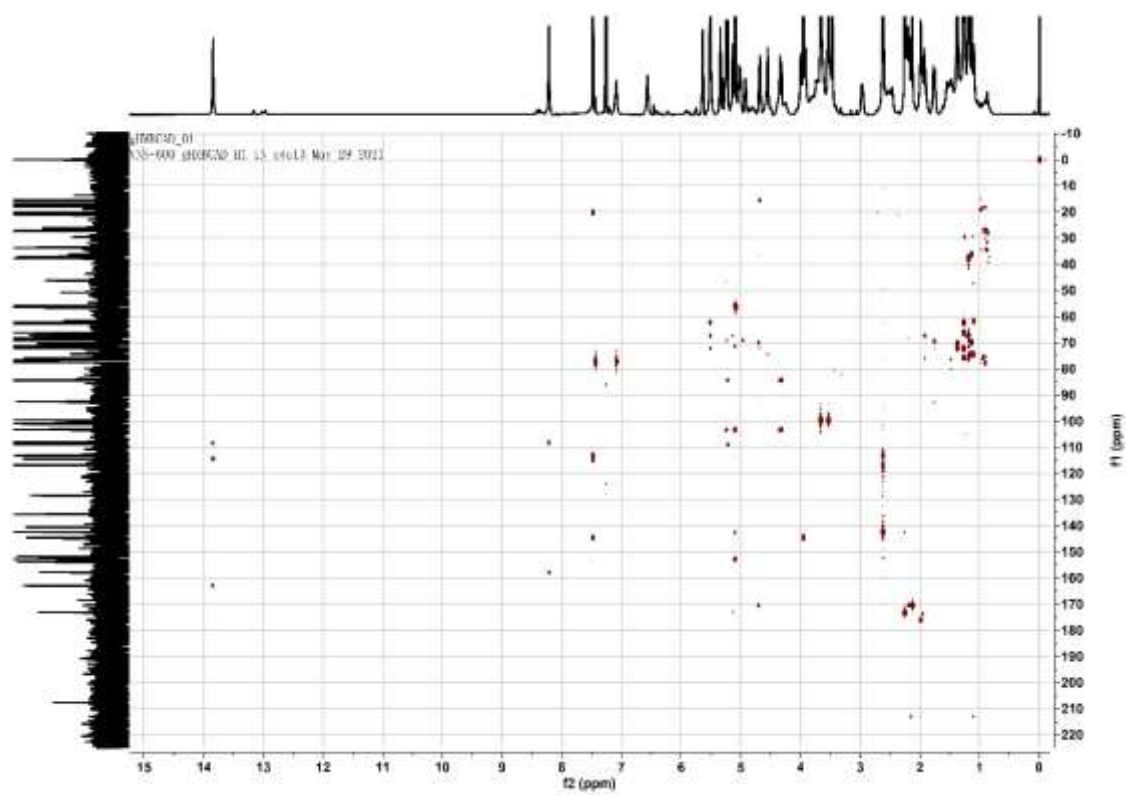

Figure S22. The HMBC spectrum of compound 16



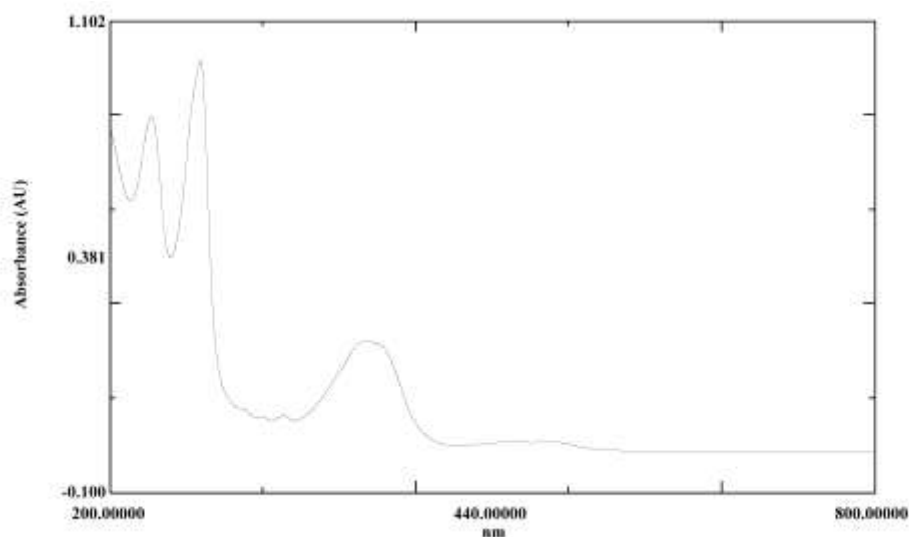

Figure S23. The UV spectrum of compound 20

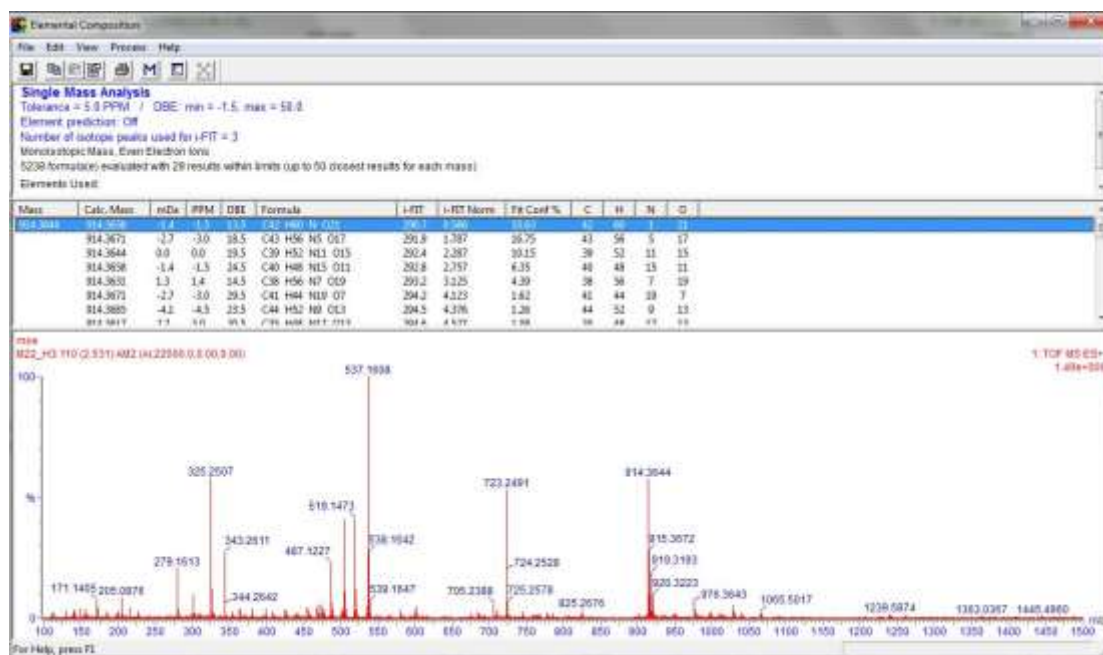

Figure S24. The HRESIMS of compound 20

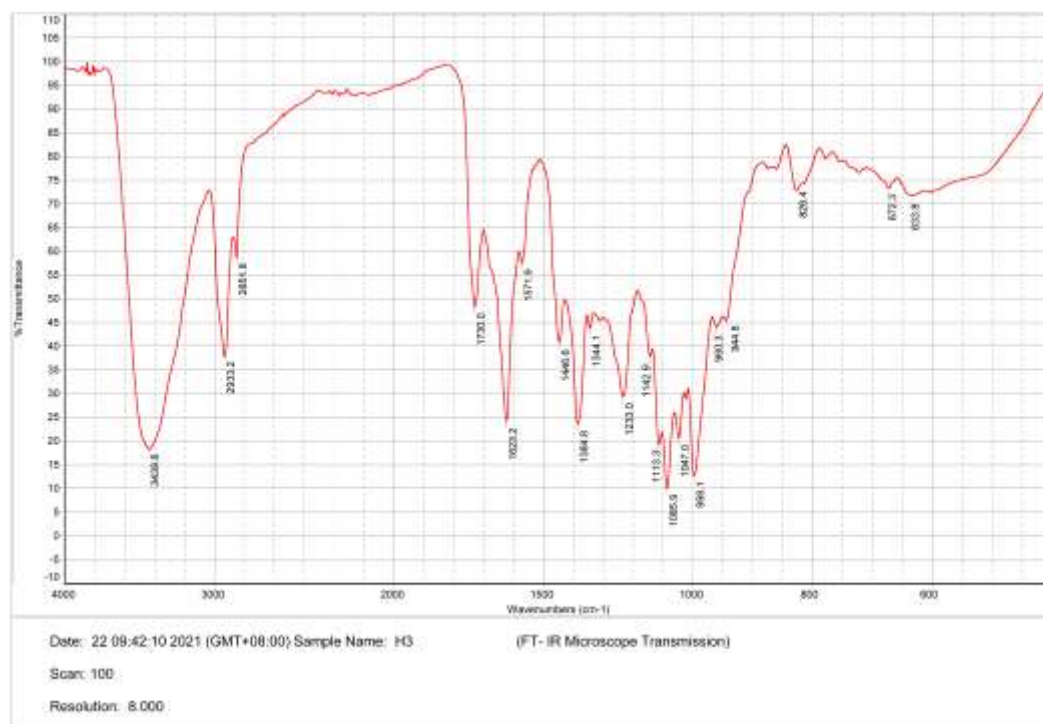

Figure S25. The IR spectrum of compound 20

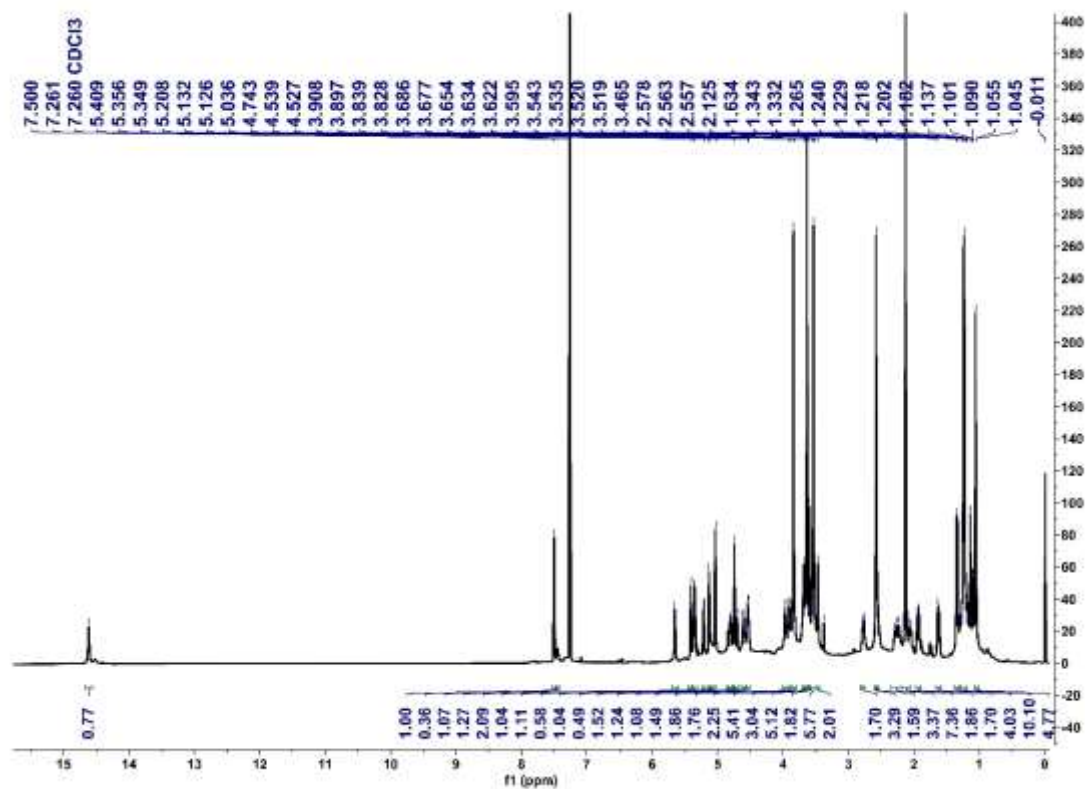

Figure S26. The  $^1\text{H}$  NMR (600 MHz) spectrum of compound 20 in  $\text{CDCl}_3$

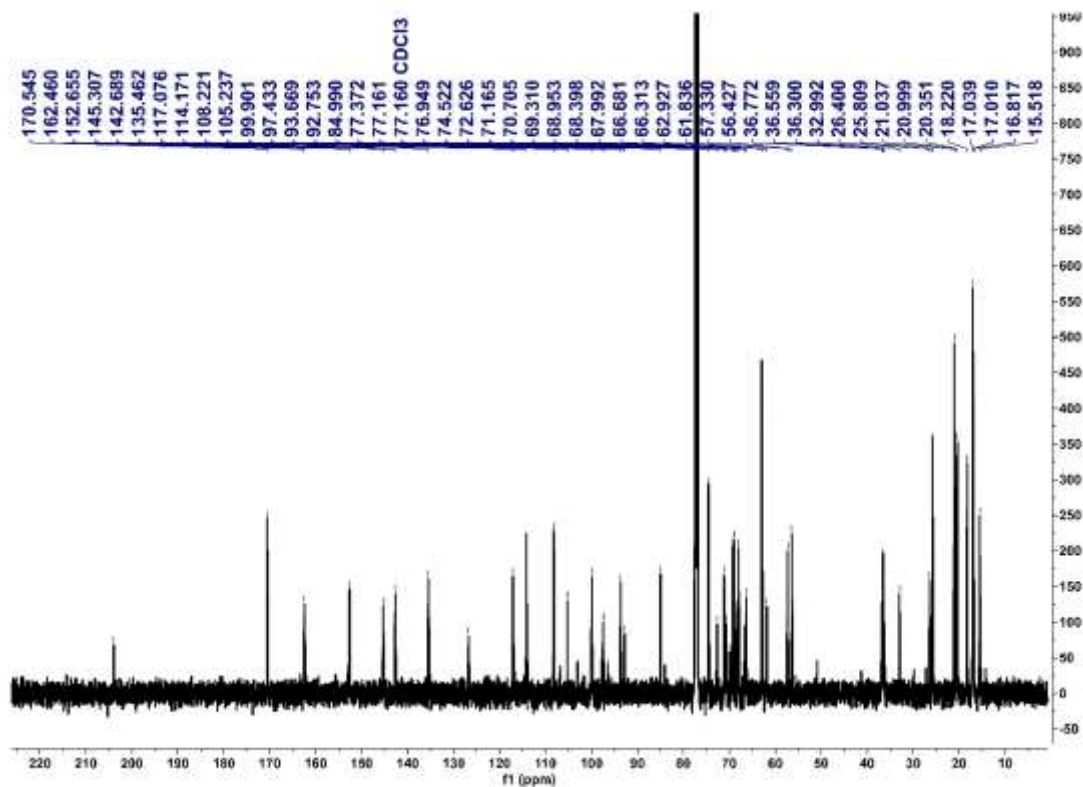

Figure S27. The  $^{13}\text{C}$  NMR (150 MHz) spectrum of compound **20** in  $\text{CDCl}_3$

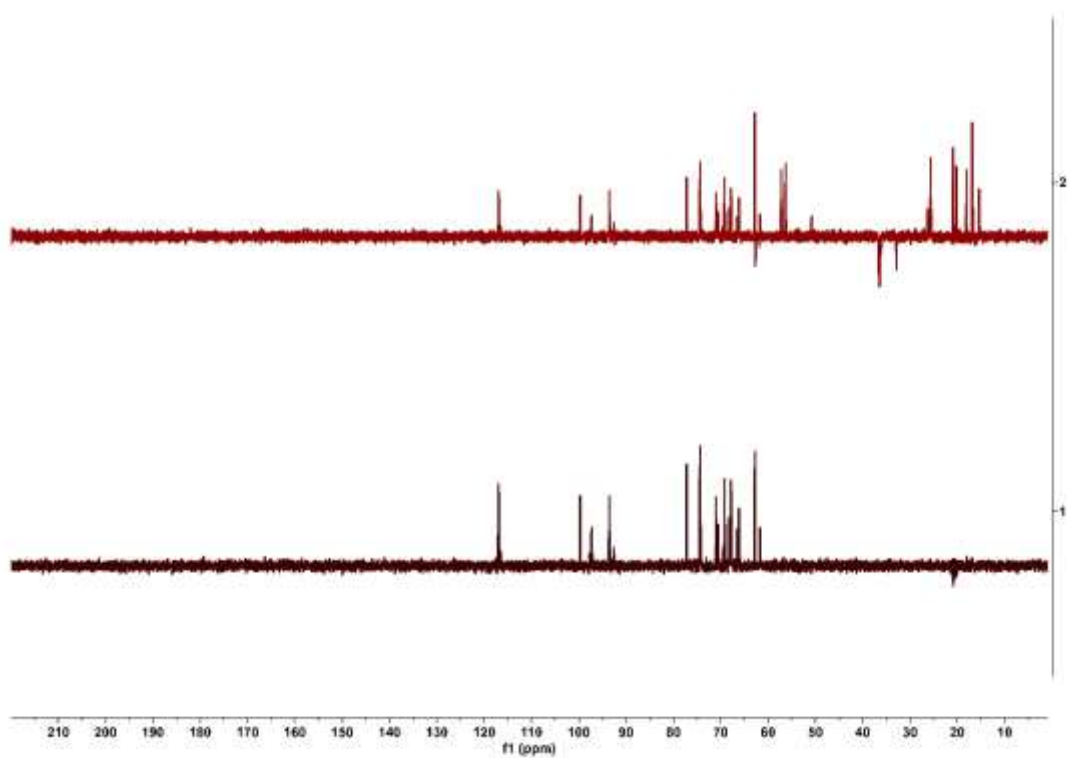

Figure S28. The DEPT spectrum of compound **20**

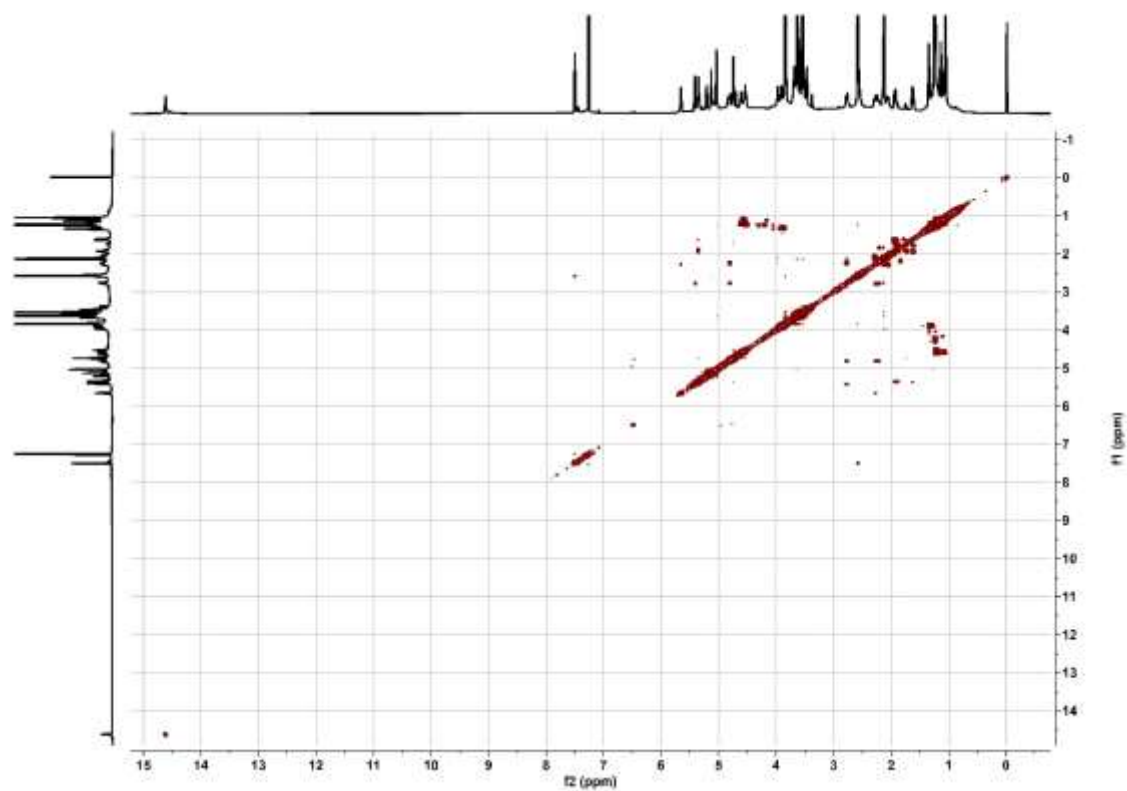

Figure S29. The  $^1\text{H}$ - $^1\text{H}$  COSY spectrum of compound 20

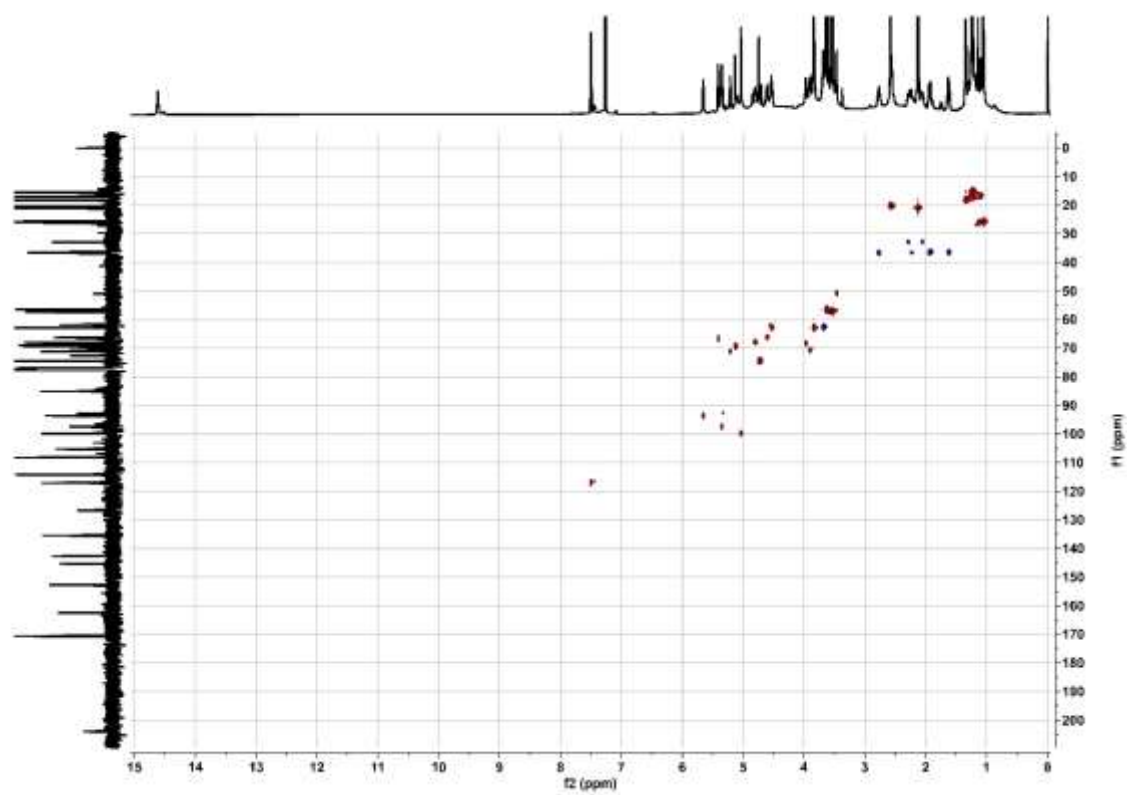

Figure S30. The HSQC spectrum of compound 20

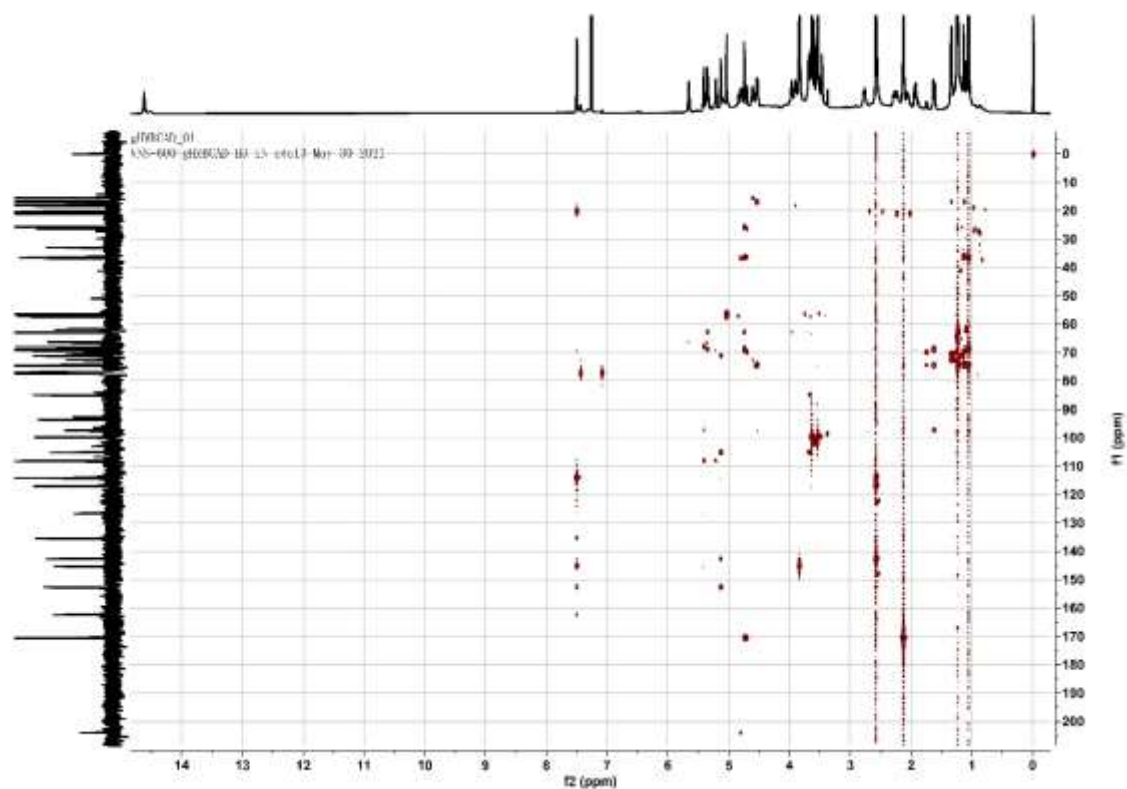

Figure S31. The HMBC spectrum of compound 20

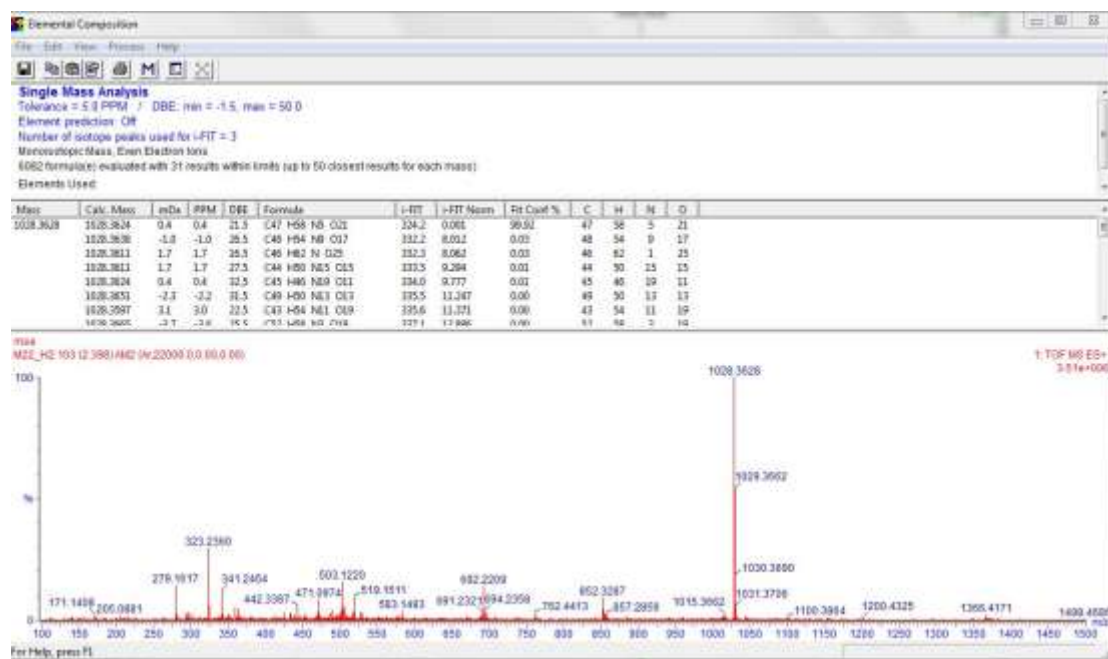

Figure S32. The HRESIMS of Compound 12





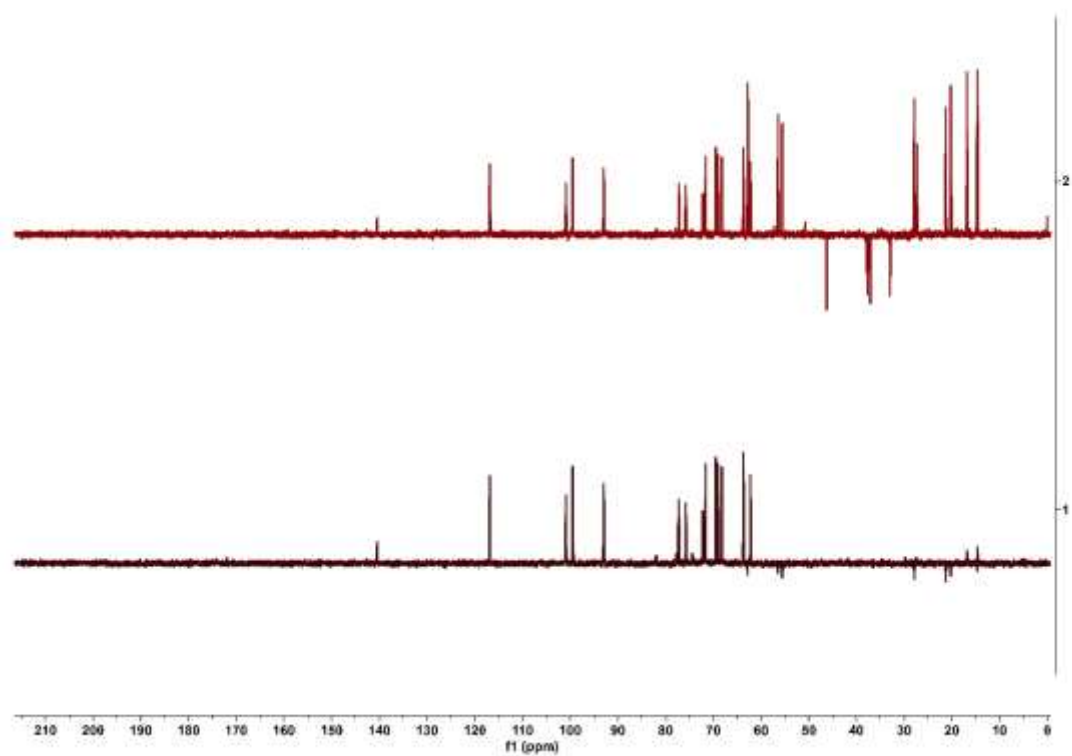

**Figure S35.** The DEPT spectrum of compound 12

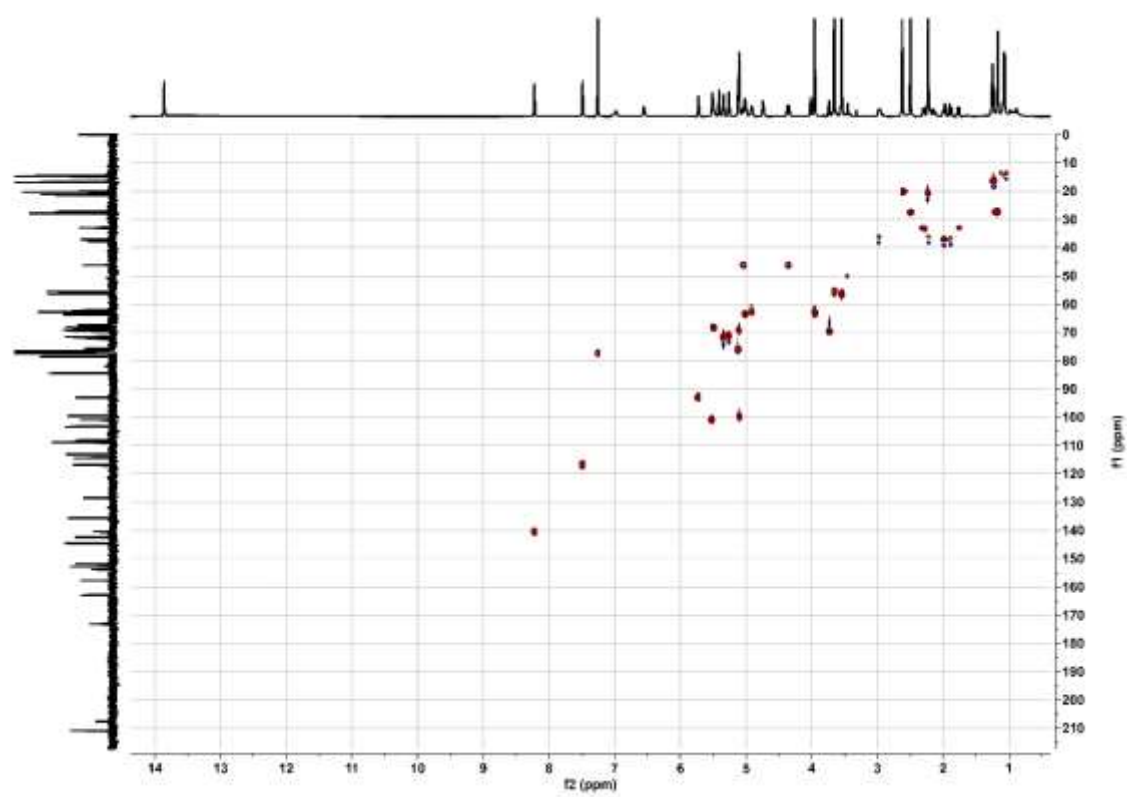

**Figure S36.** The HSQC spectrum of compound 12

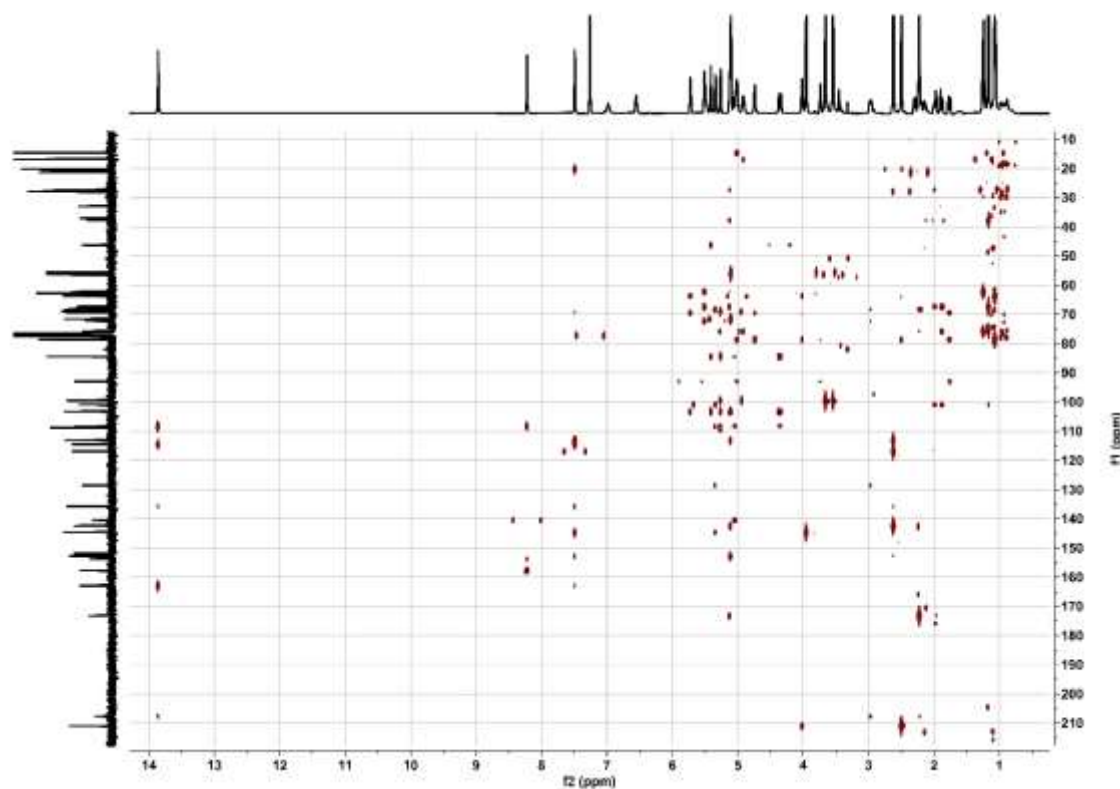

**Figure S37.** The HMBC spectrum of compound **12**

## References

1. Lee, M.D.; Fantini, A.A.; Labeda, D.P.; Maiese, W.M.; Testa, R.T.; Borders, D.B. Antitumor agents LL-D49194 $\alpha$ 1, LL-D49194 $\beta$ 1, LL-D49194 $\beta$ 2, LL-D49194 $\beta$ 3, LL-D49194 $\gamma$ , LL-D49194 $\delta$ , LL-D49194 $\epsilon$ , LL-D49194 $\xi$ , LL-D49194 $\eta$ , LL-D49194 $\omega$ 1, LL-D49194 $\omega$ 2, and LL-D49194 $\omega$ 3. Google Patents: 1986.
2. Maiese, W.M.; Labeda, D.P.; Korshalla, J.; Kuck, N.; Fantini, A.A.; Wildey, M.J.; Thomas, J.; Greenstein, M. LL-D49194 antibiotics, a novel family of antitumor agents: taxonomy, fermentation and biological properties. *J Antibiot (Tokyo)* **1990**, *43*, 253-258.
3. Maskey, R.P.; Helmke, E.; Fiebig, H.H.; Laatsch, H. Parimycin: isolation and structure elucidation of a novel cytotoxic 2,3-dihydroquinizarin analogue of gamma-indomycinone from a Marine *Streptomyces* isolate. *J Antibiot (Tokyo)* **2002**, *55*, 1031-1035.
4. Tamaoki, T.; Shirahata, K.; Iida, T.; Tomita, F. Trioxacarcins, novel antitumor antibiotics. II. Isolation, physico-chemical properties and mode of action. *J Antibiot (Tokyo)* **1981**, *34*, 1525-1530.
5. Maskey, R.P.; Helmke, E.; Kayser, O.; Fiebig, H.H.; Maier, A.; Busche, A.; Laatsch, H. Anti-cancer and antibacterial trioxacarcins with high anti-malaria activity from a marine *Streptomyces* and their absolute stereochemistry. *J Antibiot (Tokyo)* **2004**, *57*, 771-779.
6. Maskey, R.P.; Sevvana, M.; Usón, I.; Helmke, E.; Laatsch, H. Gutingimycin: a highly complex metabolite from a marine *Streptomyces*. *Angew. Chem. Int. Ed. Engl.* **2004**, *43*, 1281-1283.



7. Shirahata, K.; Iida, T. Compounds having antibiotic activity, processes for their preparation, pharmaceutical compositions containing them and their use as medicaments. Google Patents: 1984.
8. Nicolaou, K.C.; Cai, Q.; Sun, H.; Qin, B.; Zhu, S. Total Synthesis of Trioxacarcins DC-45-A1, A, D, C, and C7"-epi-C and Full Structural Assignment of Trioxacarcin C. *J. Am. Chem. Soc.* **2016**, *138*, 3118-3124.
9. Nicolaou, K.C.; Cai, Q.; Qin, B.; Petersen, M.T.; Mikkelsen, R.J.; Heretsch, P. Total synthesis of trioxacarcin DC-45-A2. *Angew. Chem. Int. Ed. Engl.* **2015**, *54*, 3074-3078.
